# Supplementary material for: Towards comparative investigation of Er- and Yb-based SMMs: the effect of the coordination environment configuration on the magnetic relaxation in the series of heteroleptic thiocyanate complexes
Source: Royal Society of Chemistry journal article supplement (doi:10.1039/c9dt02260k), 2019-01-01
Supplement: c9dt02260k1.pdf [file c9dt02260k1.pdf]

## Towards comparative investigation of Er- and Yb-based SMMs: the effect of coordination environment configuration on the magnetic relaxation in the series of heteroleptic thiocyanate complexes

Svetlana P. Petrosyants<sup>a</sup>, Konstantin A. Babeshkin<sup>a</sup>, Andrey V. Gavrikov<sup>a,\*</sup>, Andrey B. Ilyukhin<sup>a</sup>, Ekaterina V. Belova<sup>a,b</sup> and Nikolay N. Efimov<sup>a,\*</sup>

We prepared and studied two similar series of Er and Yb thiocyanates, involving  $[\text{Ln}(\text{H}_2\text{O})_5(\text{NCS})_3]\cdot\text{H}_2\text{O}$  (**1Er**, **1Yb**) as well as the molecular and ionic complexes with 2,2'-bipyridine (bpy) and 1,10-phenantroline (phen),  $[\text{Ln}(\text{H}_2\text{O})(\text{bpy})_2(\text{NCS})_3]\cdot 0.5(\text{bpy})\cdot\text{H}_2\text{O}$  (**2Er**, **2Yb**),  $[\text{Ln}(\text{H}_2\text{O})(\text{phen})_2(\text{NCS})_3]\cdot\text{phen}\cdot 0.5\text{H}_2\text{O}$  (**3Er**, **3Yb**),  $[\text{Hbpy}][\text{Ln}(\text{bpy})_2(\text{NCS})_4]\cdot\text{H}_2\text{O}$  (**4Er**, **4Yb**) and  $[\text{Hphen}][\text{Ln}(\text{phen})_2(\text{NCS})_4]$  (**5Er**, **5Yb**). All the complexes were found to exhibit the properties of field-induced single-molecule magnets. For **1Yb**, the effective value of the energy barrier for magnetization reversal,  $\Delta_{\text{eff}}/k_{\text{B}}$ , equals to 50 K, which is among the highest ones currently known for molecular SMMs on the basis of  $\text{Yb}^{3+}$ . The obtained data are discussed involving essential structural features of the complexes, namely the configuration of the Ln environment, i.e. its composition, geometry as well as mutual distribution of different donating centers. To the best of our knowledge, this work also involves experimental investigation of the largest and thus sufficiently representative series of similar mononuclear SMMs on the basis of Er and Yb within one study.

<sup>1</sup> *N.S. Kurnakov Institute of General and Inorganic Chemistry, Russian Academy of Sciences, Leninsky prosp. 31, 119991 Moscow, Russian Federation.*

<sup>2</sup> *Lomonosov Moscow State University, Department of Chemistry, GSP-1, Leninskie Gory 1/3, Moscow, 119991, Russian Federation.*

*\* Corresponding author*

*E-mail:*      *penguin1990@yandex.ru (Andrey V. Gavrikov)*  
                  *nnefimov@narod.ru (Nikolay N. Efimov)*

## Contents

|                                                                                                                                                                                                                                                                   |       |
|-------------------------------------------------------------------------------------------------------------------------------------------------------------------------------------------------------------------------------------------------------------------|-------|
| <b>Table S1.</b> Crystal data and structure refinement for the complexes.                                                                                                                                                                                         | 4-20  |
| <b>Fig.S1.</b> Experimental and theoretical (considering the texturing) powder XRD patterns of <b>1Er</b> and <b>1Yb</b> .                                                                                                                                        | 21    |
| <b>Fig.S2.</b> Rietveld refinement profiles for <b>2Er</b> , <b>2Yb</b> (a); <b>3Er</b> , <b>3Yb</b> (b); <b>4Er</b> , <b>4Yb</b> (c); <b>5Er</b> , <b>5Yb</b> (d) for room temperature powder X-ray data.                                                        | 22-25 |
| <b>Thermal behavior of molecular complexes with bpy and phen</b>                                                                                                                                                                                                  | 26    |
| <b>Fig. S3.</b> TG curves of complexes <b>2Er</b> (a) and <b>2Yb</b> (b) and mass-spectra of gaseous products of decomposition of <b>2Er</b> (c) on heating under an Ar flow.                                                                                     | 26    |
| <b>Fig. S4.</b> TG curves of complexes <b>2Er</b> (a) and <b>2Yb</b> (b) and mass-spectra of gaseous products of decomposition of <b>2Er</b> (c) on heating under an Ar flow.                                                                                     | 27    |
| <b>Table S2.</b> Mass loss in a TGA experiment during the elimination of H <sub>2</sub> O and outer-sphere molecules.                                                                                                                                             | 27    |
| <b>Fig.S5.</b> Frequency dependences of the real ( $\chi'$ , left) and imaginary ( $\chi''$ , right) components of the ac susceptibility at 2 K for <b>1Er</b> in various dc-fields.                                                                              | 28    |
| <b>Fig. S6.</b> Frequency dependences of the real ( $\chi'$ , left) and imaginary ( $\chi''$ , right) components of the ac susceptibility at 3 K for <b>1Yb</b> in various dc-fields.                                                                             | 28    |
| <b>Fig. S7.</b> Frequency dependences of the real ( $\chi'$ , left) and imaginary ( $\chi''$ , right) components of the ac susceptibility at 2 K for <b>2Er</b> in various dc-fields.                                                                             | 28    |
| <b>Fig. S8.</b> Frequency dependences of the real ( $\chi'$ , left) and imaginary ( $\chi''$ , right) components of the ac susceptibility at 3.5 K for <b>2Yb</b> in various dc-fields.                                                                           | 29    |
| <b>Fig. S9.</b> Frequency dependences of the real ( $\chi'$ , left) and imaginary ( $\chi''$ , right) components of the ac susceptibility at 2 K for <b>3Er</b> in various dc-fields.                                                                             | 29    |
| <b>Fig. S10.</b> Frequency dependences of the real ( $\chi'$ , left) and imaginary ( $\chi''$ , right) components of the ac susceptibility at 2 K for <b>3Yb</b> in various dc-fields.                                                                            | 29    |
| <b>Fig. S11.</b> Frequency dependences of the real ( $\chi'$ , left) and imaginary ( $\chi''$ , right) components of the ac susceptibility at 2 K for <b>4Er</b> in various dc-fields.                                                                            | 30    |
| <b>Fig. S12.</b> Frequency dependences of the real ( $\chi'$ , left) and imaginary ( $\chi''$ , right) components of the ac susceptibility at 3.5 K for <b>4Yb</b> in various dc-fields.                                                                          | 30    |
| <b>Fig. S13.</b> Frequency dependences of the real ( $\chi'$ , left) and imaginary ( $\chi''$ , right) components of the ac susceptibility at 2 K for <b>5Er</b> in various dc-fields.                                                                            | 30    |
| <b>Fig. S14.</b> Frequency dependences of the real ( $\chi'$ , left) and imaginary ( $\chi''$ , right) components of the ac susceptibility at 2 K for <b>5Yb</b> in various dc-fields.                                                                            | 31    |
| <b>Fig.S15.</b> Frequency dependence of the real ( $\chi'$ , left) and imaginary ( $\chi''$ , right) components of the ac susceptibility between 2 and 3 K for <b>1Er</b> in 1000 Oe <i>dc</i> -field. Solid lines were fitted using the generalized Debye model. | 31    |
| <b>Fig. S16.</b> $\tau$ vs. $T^{-1}$ plot for <b>1Er</b> in 1000 Oe <i>dc</i> -field. Blue dashed line represents the best fit by the Arrhenius equation (Orbach mechanism). Green solid line represents the best fit by the Raman mechanism.                     | 31    |

- Fig. S17.** Frequency dependencies of the real ( $\chi'$ , top) and imaginary ( $\chi''$ , bottom) components of the *ac* susceptibility between 3.5 and 7 K for **1Yb** in 2500 Oe *dc*-field. Solid lines were fitted using the generalized Debye model. 32
- Fig. S18.** Frequency dependence of the real ( $\chi'$ , left) and imaginary ( $\chi''$ , right) components of the *ac* susceptibility between 3.5 and 7 K for **2Yb** in 1000 Oe *dc*-field. Solid lines were fitted using the generalized Debye model. 32
- Fig. S19.**  $\tau$  vs.  $T^{-1}$  plot for **2Yb** in 1000 Oe *dc*-field. Blue dashed line represents the best fit by the Arrhenius equation (Orbach mechanism). Green solid line represents the best fit by the Raman mechanism. 32
- Fig. S20.** Frequency dependence of the real ( $\chi'$ , left) and imaginary ( $\chi''$ , right) components of the *ac* susceptibility between 2 and 5 K for **3Yb** in 1000 Oe *dc*-field. Solid lines were fitted using the generalized Debye model. 33
- Fig. S21.**  $\tau$  vs.  $T^{-1}$  plot for **3Yb** in 1000 Oe *dc*-field. Blue dashed line represents the best fit by the Arrhenius equation (Orbach mechanism). Green solid line represents the best fit by the Raman mechanism. 33
- Fig. S22.** Frequency dependence of the real ( $\chi'$ , left) and imaginary ( $\chi''$ , right) components of the *ac* susceptibility between 2 and 3.5 K for **4Er** in 1000 Oe *dc*-field. Solid lines were fitted using the generalized Debye model. 33
- Fig. S23.**  $\tau$  vs.  $T^{-1}$  plot for **4Er** in 1000 Oe *dc*-field. Blue dashed line represents the best fit by the Arrhenius equation (Orbach mechanism). Red solid line represents the best fit by the sum of Orbach and direct mechanisms. 34
- Fig. S24.** Frequency dependencies of the real ( $\chi'$ , top) and imaginary ( $\chi''$ , bottom) components of the *ac* susceptibility between 3.5 and 6.5 K for **4Yb** in 1000 Oe *dc*-field. Solid lines were fitted using the generalized Debye model. 34
- Fig. S25.**  $\tau$  vs.  $T^{-1}$  plot for **4Yb** in 1000 Oe *dc*-field. Blue dashed line represents the best fit by the Arrhenius equation (Orbach mechanism). Green solid line represents the best fit by the Raman mechanism. 34
- Table S3.** Results of the relaxation data approximation for the complexes with account for errors. 35

**Table S1.** Crystal data and structure refinement for the complexes.

|                                                | <b>1Er</b>                                                                    | <b>1Yb</b>                                                                     |
|------------------------------------------------|-------------------------------------------------------------------------------|--------------------------------------------------------------------------------|
| Identification code                            |                                                                               |                                                                                |
| Empirical formula                              | C <sub>3</sub> H <sub>12</sub> ErN <sub>3</sub> O <sub>6</sub> S <sub>3</sub> | C <sub>3</sub> H <sub>12</sub> N <sub>3</sub> O <sub>6</sub> S <sub>3</sub> Yb |
| Formula weight                                 | 449.60                                                                        | 455.38                                                                         |
| Temperature, K                                 | 120(2)                                                                        | 120(2)                                                                         |
| Wavelength, Å                                  | 0.71073                                                                       | 0.71073                                                                        |
| Crystal system                                 | Monoclinic                                                                    | Monoclinic                                                                     |
| Space group                                    | P2 <sub>1</sub>                                                               | P2 <sub>1</sub>                                                                |
| a, Å                                           | 8.4333(2)                                                                     | 8.4131(3)                                                                      |
| b, Å                                           | 7.1468(2)                                                                     | 7.1324(3)                                                                      |
| c, Å                                           | 12.2023(3)                                                                    | 12.1620(4)                                                                     |
| β, °                                           | 103.7620(10)                                                                  | 103.8360(10)                                                                   |
| Volume, Å <sup>3</sup>                         | 714.33(3)                                                                     | 708.61(5)                                                                      |
| Z                                              | 2                                                                             | 2                                                                              |
| D (calc), Mg/m <sup>3</sup>                    | 2.090                                                                         | 2.134                                                                          |
| μ, mm <sup>-1</sup>                            | 6.325                                                                         | 7.054                                                                          |
| F(000)                                         | 430                                                                           | 434                                                                            |
| Crystal size, mm                               | 0.4 x 0.2 x 0.18                                                              | 0.4 x 0.2 x 0.18                                                               |
| θ range, °                                     | 2.665, 33.122                                                                 | 2.671, 33.146                                                                  |
| Index ranges                                   | -12<=h<=12<br>-10<=k<=10<br>-18<=l<=18                                        | -12<=h<=12<br>-10<=k<=10<br>-18<=l<=18                                         |
| Reflections collected                          | 15215                                                                         | 14999                                                                          |
| Independent reflections, Rint                  | 5136, 0.0213                                                                  | 5103, 0.0220                                                                   |
| Completeness to θ = 25.242°                    | 99.9 %                                                                        | 99.9 %                                                                         |
| Absorption correction                          | Semi-empirical<br>from equivalents                                            | Semi-empirical<br>from equivalents                                             |
| Max., min. transmission                        | 0.2693, 0.1539                                                                | 0.2693, 0.1826                                                                 |
| Refinement method                              | Full-matrix<br>least-squares on F <sup>2</sup>                                | Full-matrix<br>least-squares on F <sup>2</sup>                                 |
| Data / restraints / parameters                 | 5136 / 13 / 183                                                               | 5103 / 13 / 183                                                                |
| Goodness-of-fit                                | 1.042                                                                         | 1.212                                                                          |
| R1, wR2 [ $I > 2\sigma(I)$ ]                   | 0.0276, 0.0696                                                                | 0.0280, 0.0694                                                                 |
| R1, wR2 (all data)                             | 0.0291, 0.0710                                                                | 0.0295, 0.0704                                                                 |
| Absolute structure parameter                   | 0.057(17)                                                                     | 0.398(17)                                                                      |
| Largest diff. peak and hole, e.Å <sup>-3</sup> | 0.551, -0.804                                                                 | 0.582, -0.858                                                                  |

## 2Er

### File 1 :

S:\Andr\Paper\SP\_Er\_Yb\_NCS\Pow\2\Er\_NCS\_bpy\Er\_NCS\_bpy\_2018\_04\_26.raw\_1

Range Number : 1

### R-Values

R<sub>exp</sub> : 4.10      R<sub>wp</sub> : 8.46      R<sub>p</sub> : 6.67      GOF : 2.07  
R<sub>exp</sub>` : 8.86      R<sub>wp</sub>` : 18.30      R<sub>p</sub>` : 16.64      DW : 0.56

Number of independent parameters : 14

### Quantitative Analysis - Rietveld

Phase 1 : [Er(H<sub>2</sub>O)(bpy)<sub>2</sub>(NCS)<sub>3</sub>]•0.5(bpy)•H<sub>2</sub>O 100.000 %

### Background

| Chebyshev polynomial, Coefficient | 0 | 353.5(14) |
|-----------------------------------|---|-----------|
|                                   | 1 | -44.2(19) |
|                                   | 2 | -10.5(17) |
|                                   | 3 | 5.7(16)   |

**Instrument**

Primary radius (mm) 280  
 Secondary radius (mm) 280  
 Linear PSD 2Th angular range (°) 2.94  
 FDS angle (°) 0.8  
 Beam spill, sample length (mm) 20  
 Intensity corrected

**Corrections**

Specimen displacement 0.22  
 LP Factor 0

**Miscellaneous**

Start X 5  
 Finish X 50

**Structure 1**

Phase name [Er (H2O) (bpy) 2 (NCS) 3] • 0.5 (bpy) • H2O  
 R-Bragg 4.142  
 Spacegroup P-1  
 Scale 0.00006249 (38)  
 Cell Mass 1536.024  
 Cell Volume (Å<sup>3</sup>) 1538.14 (25)  
 Wt% - Rietveld 100.000  
 Crystal Linear Absorption Coeff. (1/cm) 72.702 (12)  
 Crystal Density (g/cm<sup>3</sup>) 1.65825 (26)  
 Preferred Orientation (Dir 1 : 0 1 -1) 0.4766 (40)  
 (Dir 2 : 0 0 1) 0.7728 (66)  
 Fraction of Dir 1 0.440 (10)  
 PVII peak type  
 FWHM = a + b/Cos(Th) + c Tan(Th)  
 a 0.0280922  
 b 0.002285158  
 c 0.08668674  
 Exponent m = 0.6+ma+mb/Cos(Th)+mc/Tan(Th)  
 ma 0  
 mb 0  
 mc 0.05322237  
 Lattice parameters  
 a (Å) 9.7717 (12)  
 b (Å) 12.98653 (96)  
 c (Å) 13.15957 (74)  
 alpha (°) 110.9886 (52)  
 beta (°) 94.3831 (80)  
 gamma (°) 96.182 (11)

| Site | Np | x        | y       | z        | Atom | Occ | Beq |
|------|----|----------|---------|----------|------|-----|-----|
| Er1  | 2  | 0.15487  | 0.35298 | 0.16754  | Er   | 1   | 1   |
| S1   | 2  | 0.49312  | 0.64744 | 0.47155  | S    | 1   | 1   |
| S2   | 2  | 0.53655  | 0.20377 | -0.04743 | S    | 1   | 1   |
| S3   | 2  | -0.03347 | 0.24831 | -0.23976 | S    | 1   | 1   |
| O1   | 2  | 0.18500  | 0.53052 | 0.15550  | O    | 1   | 2   |
| H1   | 2  | 0.26830  | 0.57840 | 0.17880  | H    | 1   | 4   |
| H2   | 2  | 0.13250  | 0.58000 | 0.18790  | H    | 1   | 4   |
| O2   | 2  | 0.42460  | 0.66770 | 0.21630  | O    | 1   | 2   |
| H3   | 2  | 0.44110  | 0.70010 | 0.15740  | H    | 1   | 4   |
| H4   | 2  | 0.47310  | 0.72220 | 0.28280  | H    | 1   | 4   |
| N1   | 2  | 0.32790  | 0.46250 | 0.31450  | N    | 1   | 2   |
| N2   | 2  | 0.34900  | 0.33170 | 0.06650  | N    | 1   | 2   |
| N3   | 2  | 0.05590  | 0.30030 | -0.01950 | N    | 1   | 2   |
| N4   | 2  | 0.26530  | 0.20290 | 0.20600  | N    | 1   | 2   |
| N5   | 2  | -0.00330 | 0.17030 | 0.12510  | N    | 1   | 2   |
| N6   | 2  | 0.05360  | 0.36010 | 0.34091  | N    | 1   | 2   |
| N7   | 2  | -0.07820 | 0.42090 | 0.18890  | N    | 1   | 2   |
| N8   | 2  | 0.57210  | 0.89700 | 0.39650  | N    | 1   | 2   |
| C1   | 2  | 0.39780  | 0.53890 | 0.38030  | C    | 1   | 2   |

|      |   |          |          |          |   |   |   |
|------|---|----------|----------|----------|---|---|---|
| C2   | 2 | 0.42720  | 0.28110  | 0.01840  | C | 1 | 2 |
| C3   | 2 | 0.01990  | 0.27890  | -0.11080 | C | 1 | 2 |
| C4   | 2 | 0.40210  | 0.21930  | 0.23800  | C | 1 | 2 |
| H4A  | 2 | 0.45530  | 0.28750  | 0.24430  | H | 1 | 4 |
| C5   | 2 | 0.46900  | 0.14060  | 0.26220  | C | 1 | 2 |
| H5A  | 2 | 0.56610  | 0.15450  | 0.28500  | H | 1 | 4 |
| C6   | 2 | 0.39200  | 0.04280  | 0.25260  | C | 1 | 2 |
| H6A  | 2 | 0.43510  | -0.01300 | 0.26800  | H | 1 | 4 |
| C7   | 2 | 0.25240  | 0.02560  | 0.22050  | C | 1 | 2 |
| H7A  | 2 | 0.19780  | -0.04210 | 0.21440  | H | 1 | 4 |
| C8   | 2 | 0.19040  | 0.10670  | 0.19700  | C | 1 | 2 |
| C9   | 2 | 0.04100  | 0.09200  | 0.15900  | C | 1 | 2 |
| C10  | 2 | -0.05000 | 0.00130  | 0.15540  | C | 1 | 2 |
| H10A | 2 | -0.01730 | -0.05270 | 0.18060  | H | 1 | 4 |
| C11  | 2 | -0.18680 | -0.01130 | 0.11600  | C | 1 | 2 |
| H11A | 2 | -0.24970 | -0.07310 | 0.11460  | H | 1 | 4 |
| C12  | 2 | -0.23190 | 0.06600  | 0.07870  | C | 1 | 2 |
| H12A | 2 | -0.32600 | 0.05830  | 0.04910  | H | 1 | 4 |
| C13  | 2 | -0.13760 | 0.15570  | 0.08500  | C | 1 | 2 |
| H13A | 2 | -0.16910 | 0.21000  | 0.05980  | H | 1 | 4 |
| C14  | 2 | 0.12250  | 0.33220  | 0.41680  | C | 1 | 2 |
| H14A | 2 | 0.21580  | 0.31960  | 0.40910  | H | 1 | 4 |
| C15  | 2 | 0.06570  | 0.32090  | 0.50560  | C | 1 | 2 |
| H15A | 2 | 0.11840  | 0.30130  | 0.55780  | H | 1 | 4 |
| C16  | 2 | -0.06930 | 0.33880  | 0.51650  | C | 1 | 2 |
| H16A | 2 | -0.11200 | 0.33050  | 0.57620  | H | 1 | 4 |
| C17  | 2 | -0.14160 | 0.36860  | 0.44070  | C | 1 | 2 |
| H17A | 2 | -0.23500 | 0.38130  | 0.44760  | H | 1 | 4 |
| C18  | 2 | -0.07830 | 0.38040  | 0.35360  | C | 1 | 2 |
| C19  | 2 | -0.14810 | 0.41840  | 0.27260  | C | 1 | 2 |
| C20  | 2 | -0.27670 | 0.45470  | 0.28410  | C | 1 | 2 |
| H20A | 2 | -0.32440 | 0.45250  | 0.34380  | H | 1 | 4 |
| C21  | 2 | -0.33500 | 0.49390  | 0.20870  | C | 1 | 2 |
| H21A | 2 | -0.42260 | 0.51920  | 0.21610  | H | 1 | 4 |
| C22  | 2 | -0.26480 | 0.49570  | 0.12300  | C | 1 | 2 |
| H22A | 2 | -0.30280 | 0.52180  | 0.06960  | H | 1 | 4 |
| C23  | 2 | -0.13770 | 0.45870  | 0.11620  | C | 1 | 2 |
| H23A | 2 | -0.08930 | 0.46000  | 0.05660  | H | 1 | 4 |
| C24  | 2 | 0.69470  | 0.87930  | 0.35870  | C | 1 | 2 |
| H24A | 2 | 0.69860  | 0.81150  | 0.29980  | H | 1 | 4 |
| C25  | 2 | 0.81390  | 0.95340  | 0.40040  | C | 1 | 2 |
| H25A | 2 | 0.89870  | 0.93760  | 0.37160  | H | 1 | 4 |
| C26  | 2 | 0.80810  | 1.05060  | 0.48450  | C | 1 | 2 |
| H26A | 2 | 0.88890  | 1.10440  | 0.51470  | H | 1 | 4 |
| C27  | 2 | 0.68360  | 1.07040  | 0.52560  | C | 1 | 2 |
| H27A | 2 | 0.67800  | 1.13750  | 0.58470  | H | 1 | 4 |
| C28  | 2 | 0.56790  | 0.99150  | 0.47970  | C | 1 | 2 |

## 2Yb

**File 1 :**

**H:\SP\_Er\_Yb\_NCS\Pow\2\Yb\_NCS\_bpy\Yb\_NCS\_bpy\_2018\_04\_26.raw\_1**

Range Number : 1

### R-Values

Rexp : 2.84      Rwp : 7.84      Rp : 5.91      GOF : 2.76  
Rexp` : 5.69      Rwp` : 15.74      Rp` : 12.67      DW : 0.36

Number of independent parameters : 28

### Quantitative Analysis - Rietveld

Phase 1 : [Yb(H2O)(bpy)2(NCS)3]•0.5(bpy)•H2O 100.000 %

## Background

|                                   |              |
|-----------------------------------|--------------|
| One on X                          | 860 (700)    |
| Chebyshev polynomial, Coefficient | 0 653 (49)   |
|                                   | 1 75 (55)    |
|                                   | 2 -14 (30)   |
|                                   | 3 -4 (17)    |
|                                   | 4 26.7 (87)  |
|                                   | 5 -55.9 (57) |

## Instrument

|                                  |      |
|----------------------------------|------|
| Primary radius (mm)              | 280  |
| Secondary radius (mm)            | 280  |
| Linear PSD 2Th angular range (°) | 2.94 |
| FDS angle (°)                    | 1    |
| Beam spill, sample length (mm)   | 20   |
| Intensity corrected              |      |
| Full Axial Convolution           |      |
| Filament length (mm)             | 12   |
| Sample length (mm)               | 10   |
| Receiving Slit length (mm)       | 3    |
| Primary Sollers (°)              | 2.5  |
| Secondary Sollers (°)            | 2.5  |

## Corrections

|                       |           |
|-----------------------|-----------|
| Specimen displacement | 0.1329832 |
| LP Factor             | 0         |

## Miscellaneous

|          |    |
|----------|----|
| Start X  | 4  |
| Finish X | 50 |

## Structure 1

|                                           |                                                                       |
|-------------------------------------------|-----------------------------------------------------------------------|
| Phase name                                | [Yb(H <sub>2</sub> O) (bpy) 2 (NCS) 3] • 0.5 (bpy) • H <sub>2</sub> O |
| R-Bragg                                   | 3.414                                                                 |
| Spacegroup                                | P-1                                                                   |
| Scale                                     | 0.0001581 (12)                                                        |
| Cell Mass                                 | 1547.582                                                              |
| Cell Volume (Å <sup>3</sup> )             | 1537.65 (26)                                                          |
| Wt% - Rietveld                            | 100.000                                                               |
| Crystal Linear Absorption Coeff. (1/cm)   | 78.648 (13)                                                           |
| Crystal Density (g/cm <sup>3</sup> )      | 1.67127 (28)                                                          |
| Preferred Orientation Spherical Harmonics |                                                                       |
| Order                                     | 4                                                                     |
| y00                                       | 1                                                                     |
| y20                                       | 0.369 (20)                                                            |
| y21m                                      | -0.425 (17)                                                           |
| y21p                                      | -0.008 (15)                                                           |
| y22m                                      | -0.231 (22)                                                           |
| y22p                                      | -0.516 (14)                                                           |
| y40                                       | -0.075 (25)                                                           |
| y41m                                      | 0.280 (22)                                                            |
| y41p                                      | 0.009 (20)                                                            |
| y42m                                      | 0.115 (20)                                                            |
| y42p                                      | -0.320 (16)                                                           |
| y43m                                      | 0.322 (15)                                                            |
| y43p                                      | -0.101 (22)                                                           |
| y44m                                      | 0.142 (24)                                                            |
| y44p                                      | 0.008 (16)                                                            |
| PVII peak type                            |                                                                       |
| FWHM = a + b/Cos(Th) + c Tan(Th)          |                                                                       |
| a                                         | 0.000766512                                                           |
| b                                         | 0.006068987                                                           |
| c                                         | 0.1576263                                                             |
| Exponent m = 0.6+ma+mb/Cos(Th)+mc/Tan(Th) |                                                                       |
| ma                                        | 0.06540861                                                            |
| mb                                        | 0.005475635                                                           |

mc 0.004191095  
 Lattice parameters  
 a (Å) 9.7766(13)  
 b (Å) 12.98138(96)  
 c (Å) 13.14494(82)  
 alpha (°) 110.9527(57)  
 beta (°) 94.4390(88)  
 gamma (°) 95.9765(95)

| Site | Np | x        | y        | z        | Atom | Occ | Beq |
|------|----|----------|----------|----------|------|-----|-----|
| Yb1  | 2  | 0.15297  | 0.35566  | 0.16909  | Yb   | 1   | 1   |
| S1   | 2  | 0.49312  | 0.64744  | 0.47155  | S    | 1   | 1   |
| S2   | 2  | 0.53655  | 0.20377  | -0.04743 | S    | 1   | 1   |
| S3   | 2  | -0.03347 | 0.24831  | -0.23976 | S    | 1   | 1   |
| O1   | 2  | 0.18500  | 0.53052  | 0.15550  | O    | 1   | 2   |
| H1   | 2  | 0.26830  | 0.57840  | 0.17880  | H    | 1   | 4   |
| H2   | 2  | 0.13250  | 0.58000  | 0.18790  | H    | 1   | 4   |
| O2   | 2  | 0.42460  | 0.66770  | 0.21630  | O    | 1   | 2   |
| H3   | 2  | 0.44110  | 0.70010  | 0.15740  | H    | 1   | 4   |
| H4   | 2  | 0.47310  | 0.72220  | 0.28280  | H    | 1   | 4   |
| N1   | 2  | 0.32790  | 0.46250  | 0.31450  | N    | 1   | 2   |
| N2   | 2  | 0.34900  | 0.33170  | 0.06650  | N    | 1   | 2   |
| N3   | 2  | 0.05590  | 0.30030  | -0.01950 | N    | 1   | 2   |
| N4   | 2  | 0.26530  | 0.20290  | 0.20600  | N    | 1   | 2   |
| N5   | 2  | -0.00330 | 0.17030  | 0.12510  | N    | 1   | 2   |
| N6   | 2  | 0.05360  | 0.36010  | 0.34091  | N    | 1   | 2   |
| N7   | 2  | -0.07820 | 0.42090  | 0.18890  | N    | 1   | 2   |
| N8   | 2  | 0.57210  | 0.89700  | 0.39650  | N    | 1   | 2   |
| C1   | 2  | 0.39780  | 0.53890  | 0.38030  | C    | 1   | 2   |
| C2   | 2  | 0.42720  | 0.28110  | 0.01840  | C    | 1   | 2   |
| C3   | 2  | 0.01990  | 0.27890  | -0.11080 | C    | 1   | 2   |
| C4   | 2  | 0.40210  | 0.21930  | 0.23800  | C    | 1   | 2   |
| H4A  | 2  | 0.45530  | 0.28750  | 0.24430  | H    | 1   | 4   |
| C5   | 2  | 0.46900  | 0.14060  | 0.26220  | C    | 1   | 2   |
| H5A  | 2  | 0.56610  | 0.15450  | 0.28500  | H    | 1   | 4   |
| C6   | 2  | 0.39200  | 0.04280  | 0.25260  | C    | 1   | 2   |
| H6A  | 2  | 0.43510  | -0.01300 | 0.26800  | H    | 1   | 4   |
| C7   | 2  | 0.25240  | 0.02560  | 0.22050  | C    | 1   | 2   |
| H7A  | 2  | 0.19780  | -0.04210 | 0.21440  | H    | 1   | 4   |
| C8   | 2  | 0.19040  | 0.10670  | 0.19700  | C    | 1   | 2   |
| C9   | 2  | 0.04100  | 0.09200  | 0.15900  | C    | 1   | 2   |
| C10  | 2  | -0.05000 | 0.00130  | 0.15540  | C    | 1   | 2   |
| H10A | 2  | -0.01730 | -0.05270 | 0.18060  | H    | 1   | 4   |
| C11  | 2  | -0.18680 | -0.01130 | 0.11600  | C    | 1   | 2   |
| H11A | 2  | -0.24970 | -0.07310 | 0.11460  | H    | 1   | 4   |
| C12  | 2  | -0.23190 | 0.06600  | 0.07870  | C    | 1   | 2   |
| H12A | 2  | -0.32600 | 0.05830  | 0.04910  | H    | 1   | 4   |
| C13  | 2  | -0.13760 | 0.15570  | 0.08500  | C    | 1   | 2   |
| H13A | 2  | -0.16910 | 0.21000  | 0.05980  | H    | 1   | 4   |
| C14  | 2  | 0.12250  | 0.33220  | 0.41680  | C    | 1   | 2   |
| H14A | 2  | 0.21580  | 0.31960  | 0.40910  | H    | 1   | 4   |
| C15  | 2  | 0.06570  | 0.32090  | 0.50560  | C    | 1   | 2   |
| H15A | 2  | 0.11840  | 0.30130  | 0.55780  | H    | 1   | 4   |
| C16  | 2  | -0.06930 | 0.33880  | 0.51650  | C    | 1   | 2   |
| H16A | 2  | -0.11200 | 0.33050  | 0.57620  | H    | 1   | 4   |
| C17  | 2  | -0.14160 | 0.36860  | 0.44070  | C    | 1   | 2   |
| H17A | 2  | -0.23500 | 0.38130  | 0.44760  | H    | 1   | 4   |
| C18  | 2  | -0.07830 | 0.38040  | 0.35360  | C    | 1   | 2   |
| C19  | 2  | -0.14810 | 0.41840  | 0.27260  | C    | 1   | 2   |
| C20  | 2  | -0.27670 | 0.45470  | 0.28410  | C    | 1   | 2   |
| H20A | 2  | -0.32440 | 0.45250  | 0.34380  | H    | 1   | 4   |
| C21  | 2  | -0.33500 | 0.49390  | 0.20870  | C    | 1   | 2   |
| H21A | 2  | -0.42260 | 0.51920  | 0.21610  | H    | 1   | 4   |
| C22  | 2  | -0.26480 | 0.49570  | 0.12300  | C    | 1   | 2   |
| H22A | 2  | -0.30280 | 0.52180  | 0.06960  | H    | 1   | 4   |
| C23  | 2  | -0.13770 | 0.45870  | 0.11620  | C    | 1   | 2   |
| H23A | 2  | -0.08930 | 0.46000  | 0.05660  | H    | 1   | 4   |



|      |   |         |         |         |   |   |   |
|------|---|---------|---------|---------|---|---|---|
| C24  | 2 | 0.69470 | 0.87930 | 0.35870 | C | 1 | 2 |
| H24A | 2 | 0.69860 | 0.81150 | 0.29980 | H | 1 | 4 |
| C25  | 2 | 0.81390 | 0.95340 | 0.40040 | C | 1 | 2 |
| H25A | 2 | 0.89870 | 0.93760 | 0.37160 | H | 1 | 4 |
| C26  | 2 | 0.80810 | 1.05060 | 0.48450 | C | 1 | 2 |
| H26A | 2 | 0.88890 | 1.10440 | 0.51470 | H | 1 | 4 |
| C27  | 2 | 0.68360 | 1.07040 | 0.52560 | C | 1 | 2 |
| H27A | 2 | 0.67800 | 1.13750 | 0.58470 | H | 1 | 4 |
| C28  | 2 | 0.56790 | 0.99150 | 0.47970 | C | 1 | 2 |

## 3Er

### File 1 :

S:\Andr\Paper\SP\_Er\_Yb\_NCS\Pow\3\Er\_NCS\_phen\Er\_NCS\_phen\_2018\_04\_04.raw\_1

Range Number : 1

### R-Values

Rexp : 4.93      Rwp : 7.15      Rp : 5.60      GOF : 1.45  
Rexp` : 2.72      Rwp` : 3.94      Rp` : 3.68      DW : 1.04

### Quantitative Analysis - Rietveld

Phase 1 : [Er(H2O)(phen)2(NCS)3]•phen•0.5H2O 100.000 %

### Background

|                                   |   |            |
|-----------------------------------|---|------------|
| One on X                          |   | 8300(1300) |
| Chebyshev polynomial, Coefficient | 0 | -315(79)   |
|                                   | 1 | 523(82)    |
|                                   | 2 | -292(43)   |
|                                   | 3 | 159(22)    |
|                                   | 4 | -81(11)    |
|                                   | 5 | 41.5(60)   |
|                                   | 6 | -19.9(29)  |
|                                   | 7 | 12.7(17)   |

### Instrument

|                                  |      |
|----------------------------------|------|
| Primary radius (mm)              | 280  |
| Secondary radius (mm)            | 280  |
| Linear PSD 2Th angular range (°) | 2.94 |
| FDS angle (°)                    | 0.9  |
| Beam spill, sample length (mm)   | 30   |
| Intensity corrected              |      |

### Corrections

|                       |           |
|-----------------------|-----------|
| Specimen displacement | 0.2022206 |
| LP Factor             | 0         |

### Miscellaneous

|          |    |
|----------|----|
| Start X  | 5  |
| Finish X | 50 |

### Structure 1

|                                         |                                    |
|-----------------------------------------|------------------------------------|
| Phase name                              | [Er(H2O)(phen)2(NCS)3]•phen•0.5H2O |
| R-Bragg                                 | 2.509                              |
| Spacegroup                              | P-1                                |
| Scale                                   | 0.00004059(19)                     |
| Cell Mass                               | 1818.328                           |
| Cell Volume (Å <sup>3</sup> )           | 1860.03(23)                        |
| Wt% - Rietveld                          | 100.000                            |
| Crystal Linear Absorption Coeff. (1/cm) | 61.2126(77)                        |
| Crystal Density (g/cm <sup>3</sup> )    | 1.62331(20)                        |
| PVII peak type                          |                                    |
| FWHM = a + b/Cos(Th) + c Tan(Th)        |                                    |

a 0.009437339  
 b 0.01041474  
 c 0.1893084  
 Exponent  $m = 0.6 + ma + mb/\cos(\theta) + mc/\tan(\theta)$   
 ma 0  
 mb 0  
 mc 0.061891

Lattice parameters

a (Å) 10.42599 (65)  
 b (Å) 12.67156 (94)  
 c (Å) 15.2792 (10)  
 alpha (°) 96.7453 (54)  
 beta (°) 104.9875 (52)  
 gamma (°) 103.6756 (63)

| Site | Np | x        | y       | z        | Atom | Occ  | Beq |
|------|----|----------|---------|----------|------|------|-----|
| Er1  | 2  | 0.44469  | 0.29189 | 0.20935  | Er   | 1    | 1   |
| S1   | 2  | 0.86398  | 0.21953 | 0.43319  | S    | 1    | 1   |
| S2   | 2  | 0.85230  | 0.44161 | 0.08348  | S    | 1    | 1   |
| S3   | 2  | 0.15545  | 0.04450 | 0.38580  | S    | 1    | 1   |
| O1   | 2  | 0.40480  | 0.44630 | 0.13910  | O    | 1    | 2   |
| H1   | 2  | 0.42490  | 0.44490 | 0.08750  | H    | 1    | 4   |
| H2   | 2  | 0.41310  | 0.51260 | 0.16250  | H    | 1    | 4   |
| O21  | 2  | 0.49800  | 0.57930 | 0.02910  | O    | 0.25 | 2   |
| H101 | 2  | 0.45580  | 0.60750 | -0.01360 | H    | 0.25 | 4   |
| H102 | 2  | 0.53350  | 0.61620 | 0.08400  | H    | 0.25 | 4   |
| O22  | 2  | 0.55600  | 0.56030 | 0.03540  | O    | 0.25 | 2   |
| H112 | 2  | 0.58670  | 0.59470 | 0.09120  | H    | 0.25 | 4   |
| H110 | 2  | 0.49570  | 0.59440 | 0.01620  | H    | 0.25 | 4   |
| N1   | 2  | 0.62070  | 0.23390 | 0.31410  | N    | 1    | 2   |
| N2   | 2  | 0.62190  | 0.33400 | 0.13400  | N    | 1    | 2   |
| N3   | 2  | 0.29310  | 0.15510 | 0.27140  | N    | 1    | 2   |
| N4   | 2  | 0.31960  | 0.39570 | 0.30590  | N    | 1    | 2   |
| N5   | 2  | 0.59690  | 0.46440 | 0.32880  | N    | 1    | 2   |
| N6   | 2  | 0.23110  | 0.21820 | 0.06550  | N    | 1    | 2   |
| N7   | 2  | 0.41480  | 0.09860 | 0.11920  | N    | 1    | 2   |
| N8   | 2  | 0.61250  | 0.70150 | 0.20760  | N    | 1    | 2   |
| N9   | 2  | 0.33720  | 0.63710 | 0.19930  | N    | 1    | 2   |
| C1   | 2  | 0.72340  | 0.22780 | 0.36160  | C    | 1    | 2   |
| C2   | 2  | 0.71910  | 0.37880 | 0.11480  | C    | 1    | 2   |
| C3   | 2  | 0.23600  | 0.10730 | 0.31870  | C    | 1    | 2   |
| C4   | 2  | 0.18500  | 0.36270 | 0.29640  | C    | 1    | 2   |
| H4A  | 2  | 0.13290  | 0.29550 | 0.25550  | H    | 1    | 4   |
| C5   | 2  | 0.11570  | 0.42210 | 0.34400  | C    | 1    | 2   |
| H5A  | 2  | 0.01950  | 0.39490 | 0.33620  | H    | 1    | 4   |
| C6   | 2  | 0.18930  | 0.51920 | 0.40120  | C    | 1    | 2   |
| H6A  | 2  | 0.14450  | 0.56110 | 0.43360  | H    | 1    | 4   |
| C7   | 2  | 0.33130  | 0.55770 | 0.41250  | C    | 1    | 2   |
| C8   | 2  | 0.41540  | 0.66040 | 0.47180  | C    | 1    | 2   |
| H8A  | 2  | 0.37370  | 0.70520 | 0.50430  | H    | 1    | 4   |
| C9   | 2  | 0.55080  | 0.69350 | 0.48160  | C    | 1    | 2   |
| H9A  | 2  | 0.60350  | 0.76150 | 0.52120  | H    | 1    | 4   |
| C10  | 2  | 0.61780  | 0.63020 | 0.43460  | C    | 1    | 2   |
| C11  | 2  | 0.76010  | 0.66140 | 0.44430  | C    | 1    | 2   |
| H11A | 2  | 0.81680  | 0.72790 | 0.48440  | H    | 1    | 4   |
| C12  | 2  | 0.81610  | 0.59690 | 0.39670  | C    | 1    | 2   |
| H12A | 2  | 0.91190  | 0.61860 | 0.40150  | H    | 1    | 4   |
| C13  | 2  | 0.73170  | 0.49760 | 0.34000  | C    | 1    | 2   |
| H13A | 2  | 0.77290  | 0.45180 | 0.30810  | H    | 1    | 4   |
| C14  | 2  | 0.53940  | 0.52900 | 0.37500  | C    | 1    | 2   |
| C15  | 2  | 0.39300  | 0.49240 | 0.36320  | C    | 1    | 2   |
| C16  | 2  | 0.14060  | 0.27510 | 0.03930  | C    | 1    | 2   |
| H16A | 2  | 0.15510  | 0.34590 | 0.07480  | H    | 1    | 4   |
| C17  | 2  | 0.02450  | 0.23640 | -0.03810 | C    | 1    | 2   |
| H17A | 2  | -0.03800 | 0.27980 | -0.05410 | H    | 1    | 4   |
| C18  | 2  | 0.00290  | 0.13480 | -0.09020 | C    | 1    | 2   |
| H18A | 2  | -0.07450 | 0.10750 | -0.14330 | H    | 1    | 4   |

|      |   |         |          |          |   |   |   |
|------|---|---------|----------|----------|---|---|---|
| C19  | 2 | 0.09480 | 0.07140  | -0.06500 | C | 1 | 2 |
| C20  | 2 | 0.07810 | -0.03460 | -0.11530 | C | 1 | 2 |
| H20A | 2 | 0.00400 | -0.06340 | -0.17030 | H | 1 | 4 |
| C21  | 2 | 0.16650 | -0.09600 | -0.08610 | C | 1 | 2 |
| H21A | 2 | 0.15220 | -0.16730 | -0.12060 | H | 1 | 4 |
| C22  | 2 | 0.27870 | -0.05570 | -0.00570 | C | 1 | 2 |
| C23  | 2 | 0.37210 | -0.11570 | 0.02610  | C | 1 | 2 |
| H23A | 2 | 0.35870 | -0.18860 | -0.00500 | H | 1 | 4 |
| C24  | 2 | 0.48240 | -0.07000 | 0.10160  | C | 1 | 2 |
| H24A | 2 | 0.54590 | -0.11060 | 0.12410  | H | 1 | 4 |
| C25  | 2 | 0.50070 | 0.03850  | 0.14570  | C | 1 | 2 |
| H25A | 2 | 0.57920 | 0.07030  | 0.19740  | H | 1 | 4 |
| C26  | 2 | 0.30400 | 0.05250  | 0.04470  | C | 1 | 2 |
| C27  | 2 | 0.20820 | 0.11650  | 0.01490  | C | 1 | 2 |
| C28  | 2 | 0.74620 | 0.73240  | 0.21430  | C | 1 | 2 |
| H28A | 2 | 0.78260 | 0.68680  | 0.17820  | H | 1 | 4 |
| C29  | 2 | 0.83520 | 0.82800  | 0.27150  | C | 1 | 2 |
| H29A | 2 | 0.93040 | 0.84630  | 0.27440  | H | 1 | 4 |
| C30  | 2 | 0.78620 | 0.89580  | 0.32370  | C | 1 | 2 |
| H30A | 2 | 0.84670 | 0.96180  | 0.36260  | H | 1 | 4 |
| C31  | 2 | 0.64620 | 0.86720  | 0.31920  | C | 1 | 2 |
| C32  | 2 | 0.58660 | 0.93470  | 0.36840  | C | 1 | 2 |
| H32A | 2 | 0.64410 | 1.00110  | 0.40840  | H | 1 | 4 |
| C33  | 2 | 0.44960 | 0.90720  | 0.36000  | C | 1 | 2 |
| H33A | 2 | 0.41200 | 0.95490  | 0.39320  | H | 1 | 4 |
| C34  | 2 | 0.36090 | 0.80700  | 0.30160  | C | 1 | 2 |
| C35  | 2 | 0.21950 | 0.77460  | 0.29280  | C | 1 | 2 |
| H35A | 2 | 0.17860 | 0.82020  | 0.32510  | H | 1 | 4 |
| C36  | 2 | 0.14070 | 0.67670  | 0.23750  | C | 1 | 2 |
| H36A | 2 | 0.04420 | 0.65390  | 0.22990  | H | 1 | 4 |
| C37  | 2 | 0.20400 | 0.61130  | 0.19240  | C | 1 | 2 |
| H37A | 2 | 0.14770 | 0.54350  | 0.15410  | H | 1 | 4 |
| C38  | 2 | 0.41550 | 0.73570  | 0.25250  | C | 1 | 2 |
| C39  | 2 | 0.56220 | 0.76680  | 0.25990  | C | 1 | 2 |

## 3Yb

**File 1 :**

**S:\Andr\Paper\SP\_Er\_Yb\_NCS\Pow\3\Yb\_NCS\_phen\Yb\_NCS\_phen\_2018\_04\_04.raw\_1**

Range Number : 1

### R-Values

Rexp : 5.97      Rwp : 8.28      Rp : 6.58      GOF : 1.39  
Rexp` : 11.53      Rwp` : 15.98      Rp` : 13.66      DW : 1.08

Number of independent parameters : 17

### Quantitative Analysis - Rietveld

Phase 1 : [Yb(H2O)(phen)2(NCS)3]•phen•0.5H2O 100.000 %

### Background

|                                   |   |            |
|-----------------------------------|---|------------|
| Chebyshev polynomial, Coefficient | 0 | 146.01(79) |
|                                   | 1 | -26.67(85) |
|                                   | 2 | 4.51(91)   |
|                                   | 3 | 10.14(74)  |
|                                   | 4 | -6.31(73)  |

### Instrument

|                                  |      |
|----------------------------------|------|
| Primary radius (mm)              | 280  |
| Secondary radius (mm)            | 280  |
| Linear PSD 2Th angular range (°) | 2.94 |
| FDS angle (°)                    | 1    |
| Beam spill, sample length (mm)   | 25   |

Intensity corrected

### Corrections

Specimen displacement 0.3349183  
LP Factor 0

### Miscellaneous

Start X 5  
Finish X 50

### Structure 1

Phase name [Yb(H2O) (phen) 2 (NCS) 3] •phen•0.5H2O  
R-Bragg 2.294  
Spacegroup P-1  
Scale 0.00002764 (19)  
Cell Mass 1829.887  
Cell Volume (Å<sup>3</sup>) 1850.12 (32)  
Wt% - Rietveld 100.000  
Crystal Linear Absorption Coeff. (1/cm) 66.463 (11)  
Crystal Density (g/cm<sup>3</sup>) 1.64238 (28)  
Preferred Orientation Spherical Harmonics  
Order 2  
y00 1  
y20 0.009 (15)  
y21m 0.078 (12)  
y21p 0.022 (12)  
y22m 0.004 (14)  
y22p 0.088 (13)  
PVII peak type  
FWHM = a + b/Cos(Th) + c Tan(Th)  
a 0.004810939  
b 0.005862314  
c 0.2590598  
Exponent m = 0.6+ma+mb/Cos(Th) +mc/Tan(Th)  
ma 0  
mb 0  
mc 0.04134817  
Lattice parameters  
a (Å) 10.40415 (84)  
b (Å) 12.6562 (13)  
c (Å) 15.2670 (14)  
alpha (°) 96.8115 (73)  
beta (°) 105.1554 (71)  
gamma (°) 103.6804 (84)

| Site | Np | x       | y       | z        | Atom | Occ  | Beq |
|------|----|---------|---------|----------|------|------|-----|
| Yb1  | 2  | 0.44470 | 0.29143 | 0.20922  | Yb   | 1    | 1   |
| S1   | 2  | 0.86398 | 0.21953 | 0.43319  | S    | 1    | 1   |
| S2   | 2  | 0.85230 | 0.44161 | 0.08348  | S    | 1    | 1   |
| S3   | 2  | 0.15545 | 0.04450 | 0.38580  | S    | 1    | 1   |
| O1   | 2  | 0.40480 | 0.44630 | 0.13910  | O    | 1    | 2   |
| H1   | 2  | 0.42490 | 0.44490 | 0.08750  | H    | 1    | 4   |
| H2   | 2  | 0.41310 | 0.51260 | 0.16250  | H    | 1    | 4   |
| O21  | 2  | 0.49800 | 0.57930 | 0.02910  | O    | 0.25 | 2   |
| H101 | 2  | 0.45580 | 0.60750 | -0.01360 | H    | 0.25 | 4   |
| H102 | 2  | 0.53350 | 0.61620 | 0.08400  | H    | 0.25 | 4   |
| O22  | 2  | 0.55600 | 0.56030 | 0.03540  | O    | 0.25 | 2   |
| H112 | 2  | 0.58670 | 0.59470 | 0.09120  | H    | 0.25 | 4   |
| H110 | 2  | 0.49570 | 0.59440 | 0.01620  | H    | 0.25 | 4   |
| N1   | 2  | 0.62070 | 0.23390 | 0.31410  | N    | 1    | 2   |
| N2   | 2  | 0.62190 | 0.33400 | 0.13400  | N    | 1    | 2   |
| N3   | 2  | 0.29310 | 0.15510 | 0.27140  | N    | 1    | 2   |
| N4   | 2  | 0.31960 | 0.39570 | 0.30590  | N    | 1    | 2   |
| N5   | 2  | 0.59690 | 0.46440 | 0.32880  | N    | 1    | 2   |
| N6   | 2  | 0.23110 | 0.21820 | 0.06550  | N    | 1    | 2   |
| N7   | 2  | 0.41480 | 0.09860 | 0.11920  | N    | 1    | 2   |

|      |   |          |          |          |   |   |   |
|------|---|----------|----------|----------|---|---|---|
| N8   | 2 | 0.61250  | 0.70150  | 0.20760  | N | 1 | 2 |
| N9   | 2 | 0.33720  | 0.63710  | 0.19930  | N | 1 | 2 |
| C1   | 2 | 0.72340  | 0.22780  | 0.36160  | C | 1 | 2 |
| C2   | 2 | 0.71910  | 0.37880  | 0.11480  | C | 1 | 2 |
| C3   | 2 | 0.23600  | 0.10730  | 0.31870  | C | 1 | 2 |
| C4   | 2 | 0.18500  | 0.36270  | 0.29640  | C | 1 | 2 |
| H4A  | 2 | 0.13290  | 0.29550  | 0.25550  | H | 1 | 4 |
| C5   | 2 | 0.11570  | 0.42210  | 0.34400  | C | 1 | 2 |
| H5A  | 2 | 0.01950  | 0.39490  | 0.33620  | H | 1 | 4 |
| C6   | 2 | 0.18930  | 0.51920  | 0.40120  | C | 1 | 2 |
| H6A  | 2 | 0.14450  | 0.56110  | 0.43360  | H | 1 | 4 |
| C7   | 2 | 0.33130  | 0.55770  | 0.41250  | C | 1 | 2 |
| C8   | 2 | 0.41540  | 0.66040  | 0.47180  | C | 1 | 2 |
| H8A  | 2 | 0.37370  | 0.70520  | 0.50430  | H | 1 | 4 |
| C9   | 2 | 0.55080  | 0.69350  | 0.48160  | C | 1 | 2 |
| H9A  | 2 | 0.60350  | 0.76150  | 0.52120  | H | 1 | 4 |
| C10  | 2 | 0.61780  | 0.63020  | 0.43460  | C | 1 | 2 |
| C11  | 2 | 0.76010  | 0.66140  | 0.44430  | C | 1 | 2 |
| H11A | 2 | 0.81680  | 0.72790  | 0.48440  | H | 1 | 4 |
| C12  | 2 | 0.81610  | 0.59690  | 0.39670  | C | 1 | 2 |
| H12A | 2 | 0.91190  | 0.61860  | 0.40150  | H | 1 | 4 |
| C13  | 2 | 0.73170  | 0.49760  | 0.34000  | C | 1 | 2 |
| H13A | 2 | 0.77290  | 0.45180  | 0.30810  | H | 1 | 4 |
| C14  | 2 | 0.53940  | 0.52900  | 0.37500  | C | 1 | 2 |
| C15  | 2 | 0.39300  | 0.49240  | 0.36320  | C | 1 | 2 |
| C16  | 2 | 0.14060  | 0.27510  | 0.03930  | C | 1 | 2 |
| H16A | 2 | 0.15510  | 0.34590  | 0.07480  | H | 1 | 4 |
| C17  | 2 | 0.02450  | 0.23640  | -0.03810 | C | 1 | 2 |
| H17A | 2 | -0.03800 | 0.27980  | -0.05410 | H | 1 | 4 |
| C18  | 2 | 0.00290  | 0.13480  | -0.09020 | C | 1 | 2 |
| H18A | 2 | -0.07450 | 0.10750  | -0.14330 | H | 1 | 4 |
| C19  | 2 | 0.09480  | 0.07140  | -0.06500 | C | 1 | 2 |
| C20  | 2 | 0.07810  | -0.03460 | -0.11530 | C | 1 | 2 |
| H20A | 2 | 0.00400  | -0.06340 | -0.17030 | H | 1 | 4 |
| C21  | 2 | 0.16650  | -0.09600 | -0.08610 | C | 1 | 2 |
| H21A | 2 | 0.15220  | -0.16730 | -0.12060 | H | 1 | 4 |
| C22  | 2 | 0.27870  | -0.05570 | -0.00570 | C | 1 | 2 |
| C23  | 2 | 0.37210  | -0.11570 | 0.02610  | C | 1 | 2 |
| H23A | 2 | 0.35870  | -0.18860 | -0.00500 | H | 1 | 4 |
| C24  | 2 | 0.48240  | -0.07000 | 0.10160  | C | 1 | 2 |
| H24A | 2 | 0.54590  | -0.11060 | 0.12410  | H | 1 | 4 |
| C25  | 2 | 0.50070  | 0.03850  | 0.14570  | C | 1 | 2 |
| H25A | 2 | 0.57920  | 0.07030  | 0.19740  | H | 1 | 4 |
| C26  | 2 | 0.30400  | 0.05250  | 0.04470  | C | 1 | 2 |
| C27  | 2 | 0.20820  | 0.11650  | 0.01490  | C | 1 | 2 |
| C28  | 2 | 0.74620  | 0.73240  | 0.21430  | C | 1 | 2 |
| H28A | 2 | 0.78260  | 0.68680  | 0.17820  | H | 1 | 4 |
| C29  | 2 | 0.83520  | 0.82800  | 0.27150  | C | 1 | 2 |
| H29A | 2 | 0.93040  | 0.84630  | 0.27440  | H | 1 | 4 |
| C30  | 2 | 0.78620  | 0.89580  | 0.32370  | C | 1 | 2 |
| H30A | 2 | 0.84670  | 0.96180  | 0.36260  | H | 1 | 4 |
| C31  | 2 | 0.64620  | 0.86720  | 0.31920  | C | 1 | 2 |
| C32  | 2 | 0.58660  | 0.93470  | 0.36840  | C | 1 | 2 |
| H32A | 2 | 0.64410  | 1.00110  | 0.40840  | H | 1 | 4 |
| C33  | 2 | 0.44960  | 0.90720  | 0.36000  | C | 1 | 2 |
| H33A | 2 | 0.41200  | 0.95490  | 0.39320  | H | 1 | 4 |
| C34  | 2 | 0.36090  | 0.80700  | 0.30160  | C | 1 | 2 |
| C35  | 2 | 0.21950  | 0.77460  | 0.29280  | C | 1 | 2 |
| H35A | 2 | 0.17860  | 0.82020  | 0.32510  | H | 1 | 4 |
| C36  | 2 | 0.14070  | 0.67670  | 0.23750  | C | 1 | 2 |
| H36A | 2 | 0.04420  | 0.65390  | 0.22990  | H | 1 | 4 |
| C37  | 2 | 0.20400  | 0.61130  | 0.19240  | C | 1 | 2 |
| H37A | 2 | 0.14770  | 0.54350  | 0.15410  | H | 1 | 4 |
| C38  | 2 | 0.41550  | 0.73570  | 0.25250  | C | 1 | 2 |
| C39  | 2 | 0.56220  | 0.76680  | 0.25990  | C | 1 | 2 |

# 4Er

## File 1 :

G:\Andr\Paper\SP\_Er\_Yb\_NCS\Pow\4\Er\_NCS\_bpy\_HNCS\Er\_NCS\_bpy\_HNCS\_2018\_04\_25.raw\_1

Range Number : 1

## R-Values

Rexp : 4.37      Rwp : 8.09      Rp : 5.75      GOF : 1.85

Rexp` : 8.93      Rwp` : 16.51      Rp` : 13.39      DW : 1.17

Number of independent parameters : 14

## Quantitative Analysis - Rietveld

Phase 1 : [Hbpy] [Er(NCS) 4 (bpy) 2]      100.000 %

## Background

|                                   |   |            |
|-----------------------------------|---|------------|
| One on X                          |   | 0 (510)    |
| Chebyshev polynomial, Coefficient | 0 | 295 (32)   |
|                                   | 1 | -15 (33)   |
|                                   | 2 | -10 (17)   |
|                                   | 3 | -14.8 (88) |
|                                   | 4 | 8.8 (42)   |
|                                   | 5 | -8.6 (25)  |

## Instrument

|                                  |      |
|----------------------------------|------|
| Primary radius (mm)              | 280  |
| Secondary radius (mm)            | 280  |
| Linear PSD 2Th angular range (°) | 2.94 |
| FDS angle (°)                    | 1.2  |
| Beam spill, sample length (mm)   | 18   |
| Intensity corrected              |      |

## Corrections

|                       |           |
|-----------------------|-----------|
| Specimen displacement | 0.2324584 |
| LP Factor             | 0         |

## Miscellaneous

|          |    |
|----------|----|
| Start X  | 5  |
| Finish X | 50 |

## hkl Phase - 1 Lebail method

|                                               |                            |
|-----------------------------------------------|----------------------------|
| Phase name                                    | [Hbpy] [Er(NCS) 4 (bpy) 2] |
| R-Bragg                                       | 0.957                      |
| Spacegroup                                    | P-1                        |
| Cell Mass                                     | 1738.31                    |
| Cell Volume (Å <sup>3</sup> )                 | 1795.66 (13)               |
| Wt% - Rietveld                                | 100.000                    |
| Crystallite Size                              |                            |
| Cry size Lorentzian (nm)                      | 190.8 (28)                 |
| PV_MOD peak type: a + b Tan(Th) + c / Cos(Th) |                            |
| FWHM a                                        | 0.0001000024               |
| b                                             | 0.0746289                  |
| c                                             | 0.0001000024               |
| Lorentzian mix a                              | 0.0001000024               |
| b                                             | 0.212323                   |
| c                                             | 0.0001000024               |
| Lattice parameters                            |                            |
| a (Å)                                         | 9.65697 (39)               |
| b (Å)                                         | 13.28613 (38)              |
| c (Å)                                         | 16.30576 (63)              |
| alpha (°)                                     | 112.3937 (28)              |
| beta (°)                                      | 94.5259 (37)               |
| gamma (°)                                     | 107.8103 (32)              |

# 4Yb

## File 1 :

G:\Andr\Paper\SP\_Er\_Yb\_NCS\Pow\4\Yb\_NCS\_bpy\_HNCS\Yb\_NCS\_bpy\_HNCS\_2018\_04\_25.raw\_1

Range Number : 1

## R-Values

Rexp : 2.98      Rwp : 8.59      Rp : 5.86      GOF : 2.88  
Rexp` : 6.39      Rwp` : 18.44      Rp` : 14.53      DW : 1.15

## Quantitative Analysis - Rietveld

Phase 1 : [Hbpy] [Yb(NCS) 4 (bpy) 2]      100.000 %

## Background

|                                   |   |            |
|-----------------------------------|---|------------|
| Chebyshev polynomial, Coefficient | 0 | 675.4 (22) |
|                                   | 1 | 167.0 (37) |
|                                   | 2 | 6.2 (34)   |
|                                   | 3 | -39.4 (33) |
|                                   | 4 | 28.4 (30)  |
|                                   | 5 | -21.8 (30) |

## Instrument

|                                  |      |
|----------------------------------|------|
| Primary radius (mm)              | 280  |
| Secondary radius (mm)            | 280  |
| Linear PSD 2Th angular range (°) | 2.94 |
| FDS angle (°)                    | 1.2  |
| Beam spill, sample length (mm)   | 18   |
| Intensity corrected              |      |

## Corrections

|                       |               |
|-----------------------|---------------|
| Specimen displacement | -0.0009435189 |
| LP Factor             | 0             |

## Miscellaneous

|          |    |
|----------|----|
| Start X  | 5  |
| Finish X | 50 |

## hkl Phase - 1 Le Bail method

|                                               |                            |
|-----------------------------------------------|----------------------------|
| Phase name                                    | [Hbpy] [Yb(NCS) 4 (bpy) 2] |
| R-Bragg                                       | 0.994                      |
| Spacegroup                                    | P-1                        |
| Cell Mass                                     | 1749.870                   |
| Cell Volume (Å <sup>3</sup> )                 | 1788.68 (15)               |
| Wt% - Rietveld                                | 100.000                    |
| PV_MOD peak type: a + b Tan(Th) + c / Cos(Th) |                            |
| FWHM a                                        | 0.04983109                 |
| b                                             | 0.0001                     |
| c                                             | 0.01439521                 |
| Lorentzian mix a                              | 0.8456502                  |
| b                                             | 0.0001                     |
| c                                             | 0.3323685                  |
| Lattice parameters                            |                            |
| a (Å)                                         | 9.64083 (51)               |
| b (Å)                                         | 13.27715 (39)              |
| c (Å)                                         | 16.29354 (72)              |
| alpha (°)                                     | 112.4800 (28)              |
| beta (°)                                      | 94.4975 (43)               |
| gamma (°)                                     | 107.8313 (36)              |

# 5Er

**File 1 :****S:\Andr\Paper\SP\_Er\_Yb\_NCS\Pow\5\Er\_NCS\_phen\_HNCS\Er\_NCS\_phen\_HNCS\_2018\_05\_04.raw\_1**

Range Number : 1

**R-Values**

Rexp : 2.92      Rwp : 7.26      Rp : 5.64      GOF : 2.48  
Rexp` : 3.27      Rwp` : 8.12      Rp` : 7.05      DW : 0.39

Number of independent parameters : 17

**Quantitative Analysis - Rietveld**

Phase 1 : [Hphen][Er(NCS)4(phen)2]      100.000 %

**Background**

One on X      9200(1900)  
Chebychev polynomial, Coefficient    0      70(140)  
                                          1      660(150)  
                                          2      -469(84)  
                                          3      207(47)  
                                          4      -94(26)  
                                          5      45(15)  
                                          6      -31.8(75)  
                                          7      55.1(48)

**Instrument**

Primary radius (mm)      280  
Secondary radius (mm)      280  
Linear PSD 2Th angular range (°)      2.94  
FDS angle (°)      1  
Beam spill, sample length (mm)      25  
Intensity corrected

**Corrections**

Specimen displacement      0.2  
LP Factor      0

**Miscellaneous**

Start X      4  
Finish X      50

**Structure 1**

Phase name      [Hphen][Er(NCS)4(phen)2]  
R-Bragg      3.933  
Spacegroup      P21/n  
Scale      0.00002210(12)  
Cell Mass      3764.933  
Cell Volume (Å<sup>3</sup>)      3873.24(35)  
Wt% - Rietveld      100.000  
Crystal Linear Absorption Coeff. (1/cm)      63.7363(58)  
Crystal Density (g/cm<sup>3</sup>)      1.61411(15)  
Preferred Orientation (Dir 1 : 1 -1 -1)      0.5756(51)  
                                          (Dir 2 : 0 1 0)      0.674(12)  
Fraction of Dir 1      0.693(19)  
PV\_MOD peak type: a + b Tan(Th) + c / Cos(Th)  
FWHM a      0.04(43)  
          b      0.083(80)  
          c      0.04(43)  
Lorentzian mix a      0.5(50)  
                  b      0.24(99)  
                  c      0.1(50)  
Lattice parameters  
a (Å)      12.44936(54)



|          |              |
|----------|--------------|
| b (Å)    | 16.59200(74) |
| c (Å)    | 18.7695(12)  |
| beta (°) | 92.5343(42)  |

| Site | Np | x       | y        | z       | Atom | Occ | Beq |
|------|----|---------|----------|---------|------|-----|-----|
| Er1  | 4  | 0.54633 | 0.18304  | 0.28683 | Er   | 1   | 1   |
| S1   | 4  | 0.93692 | 0.14932  | 0.21442 | S    | 1   | 1   |
| S2   | 4  | 0.16074 | 0.19907  | 0.36177 | S    | 1   | 1   |
| S3   | 4  | 0.66095 | -0.05586 | 0.45204 | S    | 1   | 1   |
| S4   | 4  | 0.43193 | -0.03896 | 0.10436 | S    | 1   | 1   |
| N1   | 4  | 0.72213 | 0.14473  | 0.25352 | N    | 1   | 2   |
| N2   | 4  | 0.36687 | 0.15324  | 0.32178 | N    | 1   | 2   |
| N3   | 4  | 0.58815 | 0.07378  | 0.36676 | N    | 1   | 2   |
| N4   | 4  | 0.49369 | 0.07428  | 0.20809 | N    | 1   | 2   |
| N5   | 4  | 0.54746 | 0.24790  | 0.40855 | N    | 1   | 2   |
| N6   | 4  | 0.67062 | 0.30797  | 0.30471 | N    | 1   | 2   |
| N7   | 4  | 0.43707 | 0.31657  | 0.26737 | N    | 1   | 2   |
| N8   | 4  | 0.55056 | 0.24397  | 0.16469 | N    | 1   | 2   |
| N9   | 4  | 0.69372 | 0.08338  | 0.57529 | N    | 1   | 2   |
| H1   | 4  | 0.71500 | 0.05630  | 0.53630 | H    | 1   | 4   |
| N10  | 4  | 0.81207 | 0.15041  | 0.47210 | N    | 1   | 2   |
| C1   | 4  | 0.81170 | 0.14556  | 0.23681 | C    | 1   | 2   |
| C2   | 4  | 0.28060 | 0.17089  | 0.33912 | C    | 1   | 2   |
| C3   | 4  | 0.61911 | 0.02041  | 0.40218 | C    | 1   | 2   |
| C4   | 4  | 0.46783 | 0.02686  | 0.16507 | C    | 1   | 2   |
| C5   | 4  | 0.49200 | 0.21745  | 0.46062 | C    | 1   | 2   |
| H5A  | 4  | 0.46320 | 0.16400  | 0.45530 | H    | 1   | 4   |
| C6   | 4  | 0.47350 | 0.25985  | 0.52307 | C    | 1   | 2   |
| H6A  | 4  | 0.43290 | 0.23560  | 0.55910 | H    | 1   | 4   |
| C7   | 4  | 0.51450 | 0.33656  | 0.53152 | C    | 1   | 2   |
| H7A  | 4  | 0.50140 | 0.36680  | 0.57310 | H    | 1   | 4   |
| C8   | 4  | 0.57610 | 0.37050  | 0.47873 | C    | 1   | 2   |
| C9   | 4  | 0.62600 | 0.44941  | 0.48467 | C    | 1   | 2   |
| H9A  | 4  | 0.61540 | 0.48160  | 0.52560 | H    | 1   | 4   |
| C10  | 4  | 0.68730 | 0.47858  | 0.43365 | C    | 1   | 2   |
| H10A | 4  | 0.71920 | 0.53100  | 0.43910 | H    | 1   | 4   |
| C11  | 4  | 0.70560 | 0.43257  | 0.37152 | C    | 1   | 2   |
| C12  | 4  | 0.77180 | 0.45955  | 0.31798 | C    | 1   | 2   |
| H12A | 4  | 0.80560 | 0.51150  | 0.32160 | H    | 1   | 4   |
| C13  | 4  | 0.78770 | 0.41156  | 0.26104 | C    | 1   | 2   |
| H13A | 4  | 0.83310 | 0.42920  | 0.22480 | H    | 1   | 4   |
| C14  | 4  | 0.73608 | 0.33578  | 0.25647 | C    | 1   | 2   |
| H14A | 4  | 0.74860 | 0.30240  | 0.21660 | H    | 1   | 4   |
| C15  | 4  | 0.65672 | 0.35501  | 0.36266 | C    | 1   | 2   |
| C16  | 4  | 0.59155 | 0.32392  | 0.41737 | C    | 1   | 2   |
| C17  | 4  | 0.37659 | 0.35153  | 0.31476 | C    | 1   | 2   |
| H17A | 4  | 0.35680 | 0.32010  | 0.35440 | H    | 1   | 4   |
| C18  | 4  | 0.33990 | 0.43229  | 0.30994 | C    | 1   | 2   |
| H18A | 4  | 0.29520 | 0.45430  | 0.34490 | H    | 1   | 4   |
| C19  | 4  | 0.36960 | 0.47861  | 0.25420 | C    | 1   | 2   |
| H19A | 4  | 0.34770 | 0.53400  | 0.25080 | H    | 1   | 4   |
| C20  | 4  | 0.43230 | 0.44452  | 0.20205 | C    | 1   | 2   |
| C21  | 4  | 0.46680 | 0.48919  | 0.14191 | C    | 1   | 2   |
| H21A | 4  | 0.44860 | 0.54520  | 0.13730 | H    | 1   | 4   |
| C22  | 4  | 0.52410 | 0.45367  | 0.09242 | C    | 1   | 2   |
| H22A | 4  | 0.54690 | 0.48510  | 0.05370 | H    | 1   | 4   |
| C23  | 4  | 0.55220 | 0.36865  | 0.09632 | C    | 1   | 2   |
| C24  | 4  | 0.60660 | 0.32845  | 0.04379 | C    | 1   | 2   |
| H24A | 4  | 0.62720 | 0.35710  | 0.00290 | H    | 1   | 4   |
| C25  | 4  | 0.63020 | 0.24769  | 0.05122 | C    | 1   | 2   |
| H25A | 4  | 0.66520 | 0.21900  | 0.01500 | H    | 1   | 4   |
| C26  | 4  | 0.60190 | 0.20789  | 0.11337 | C    | 1   | 2   |
| H26A | 4  | 0.62050 | 0.15210  | 0.11890 | H    | 1   | 4   |
| C27  | 4  | 0.52280 | 0.32368  | 0.15595 | C    | 1   | 2   |
| C28  | 4  | 0.46294 | 0.36177  | 0.20975 | C    | 1   | 2   |
| C29  | 4  | 0.63590 | 0.04593  | 0.62260 | C    | 1   | 2   |
| H29A | 4  | 0.61410 | -0.00900 | 0.61510 | H    | 1   | 4   |

|      |   |         |         |         |   |   |   |
|------|---|---------|---------|---------|---|---|---|
| C30  | 4 | 0.60710 | 0.08643 | 0.68276 | C | 1 | 2 |
| H30A | 4 | 0.56490 | 0.05970 | 0.71660 | H | 1 | 4 |
| C31  | 4 | 0.63970 | 0.16546 | 0.69362 | C | 1 | 2 |
| H31A | 4 | 0.62050 | 0.19340 | 0.73520 | H | 1 | 4 |
| C32  | 4 | 0.70140 | 0.20510 | 0.64337 | C | 1 | 2 |
| C33  | 4 | 0.73730 | 0.28746 | 0.64971 | C | 1 | 2 |
| H33A | 4 | 0.72140 | 0.31770 | 0.69080 | H | 1 | 4 |
| C34  | 4 | 0.79300 | 0.32298 | 0.59898 | C | 1 | 2 |
| H34A | 4 | 0.81460 | 0.37820 | 0.60450 | H | 1 | 4 |
| C35  | 4 | 0.82065 | 0.27956 | 0.53646 | C | 1 | 2 |
| C36  | 4 | 0.87770 | 0.31401 | 0.48118 | C | 1 | 2 |
| H36A | 4 | 0.90120 | 0.36910 | 0.48390 | H | 1 | 4 |
| C37  | 4 | 0.89900 | 0.26788 | 0.42397 | C | 1 | 2 |
| H37A | 4 | 0.93650 | 0.29060 | 0.38590 | H | 1 | 4 |
| C38  | 4 | 0.86490 | 0.18613 | 0.42146 | C | 1 | 2 |
| H38A | 4 | 0.88080 | 0.15480 | 0.38100 | H | 1 | 4 |
| C39  | 4 | 0.78929 | 0.19759 | 0.52839 | C | 1 | 2 |
| C40  | 4 | 0.72858 | 0.16164 | 0.58301 | C | 1 | 2 |

## 5Yb

### File 1 :

S:\Andr\Paper\SP\_Er\_Yb\_NCS\Pow\5\Yb\_NCS\_phen\_HNCS\Yb\_NCS\_phen\_HNCS\_2018\_05\_04.raw\_1

Range Number : 1

### R-Values

Rexp : 3.96      Rwp : 8.06      Rp : 6.28      GOF : 2.04  
Rexp` : 8.72      Rwp` : 17.76      Rp` : 16.17      DW : 0.71

Number of independent parameters : 14

### Quantitative Analysis - Rietveld

Phase 1 : [Hphen] [Yb(NCS)4(phen)2]      100.000 %

### Background

| Chebyshev polynomial, Coefficient | 0 | 385.0(14) |
|-----------------------------------|---|-----------|
|                                   | 1 | -44.9(20) |
|                                   | 2 | -19.0(19) |
|                                   | 3 | -9.1(18)  |
|                                   | 4 | 6.6(16)   |
|                                   | 5 | -17.1(16) |

### Instrument

|                                  |      |
|----------------------------------|------|
| Primary radius (mm)              | 280  |
| Secondary radius (mm)            | 280  |
| Linear PSD 2Th angular range (°) | 2.94 |
| FDS angle (°)                    | 1    |
| Beam spill, sample length (mm)   | 30   |
| Intensity corrected              |      |

### Corrections

|                       |           |
|-----------------------|-----------|
| Specimen displacement | 0.2767687 |
| LP Factor             | 0         |

### Miscellaneous

|          |    |
|----------|----|
| Start X  | 4  |
| Finish X | 50 |

### Structure 1

|            |                           |
|------------|---------------------------|
| Phase name | [Hphen] [Yb(NCS)4(phen)2] |
| R-Bragg    | 3.174                     |
| Spacegroup | P21/n                     |

Scale 0.000010700 (60)  
 Cell Mass 3788.049  
 Cell Volume (Å<sup>3</sup>) 3862.45 (32)  
 Wt% - Rietveld 100.000  
 Crystal Linear Absorption Coeff. (1/cm) 68.6296 (56)  
 Crystal Density (g/cm<sup>3</sup>) 1.62855 (13)  
 Preferred Orientation (Dir 1 : 1 -1 -1) 0.7433 (64)  
 (Dir 2 : 0 1 0) 0.672 (39)  
 Fraction of Dir 1 0.853 (32)  
 PVII peak type  
 FWHM = a + b/Cos(Th) + c Tan(Th)  
 a 0.009147276  
 b 0.02198601  
 c 0.005215139  
 Exponent m = 0.6+ma+mb/Cos(Th)+mc/Tan(Th)  
 ma 0.1347203  
 mb 0.009668545  
 mc 0.04065351  
 Lattice parameters  
 a (Å) 12.44280 (49)  
 b (Å) 16.59188 (76)  
 c (Å) 18.7246 (10)  
 beta (°) 92.3426 (38)

| Site | Np | x       | y        | z       | Atom | Occ | Beq |
|------|----|---------|----------|---------|------|-----|-----|
| Yb1  | 4  | 0.55090 | 0.17621  | 0.28812 | Yb   | 1   | 1   |
| S1   | 4  | 0.93692 | 0.14932  | 0.21442 | S    | 1   | 1   |
| S2   | 4  | 0.16074 | 0.19907  | 0.36177 | S    | 1   | 1   |
| S3   | 4  | 0.66095 | -0.05586 | 0.45204 | S    | 1   | 1   |
| S4   | 4  | 0.43193 | -0.03896 | 0.10436 | S    | 1   | 1   |
| N1   | 4  | 0.72213 | 0.14473  | 0.25352 | N    | 1   | 2   |
| N2   | 4  | 0.36687 | 0.15324  | 0.32178 | N    | 1   | 2   |
| N3   | 4  | 0.58815 | 0.07378  | 0.36676 | N    | 1   | 2   |
| N4   | 4  | 0.49369 | 0.07428  | 0.20809 | N    | 1   | 2   |
| N5   | 4  | 0.54746 | 0.24790  | 0.40855 | N    | 1   | 2   |
| N6   | 4  | 0.67062 | 0.30797  | 0.30471 | N    | 1   | 2   |
| N7   | 4  | 0.43707 | 0.31657  | 0.26737 | N    | 1   | 2   |
| N8   | 4  | 0.55056 | 0.24397  | 0.16469 | N    | 1   | 2   |
| N9   | 4  | 0.69372 | 0.08338  | 0.57529 | N    | 1   | 2   |
| H1   | 4  | 0.71500 | 0.05630  | 0.53630 | H    | 1   | 4   |
| N10  | 4  | 0.81207 | 0.15041  | 0.47210 | N    | 1   | 2   |
| C1   | 4  | 0.81170 | 0.14556  | 0.23681 | C    | 1   | 2   |
| C2   | 4  | 0.28060 | 0.17089  | 0.33912 | C    | 1   | 2   |
| C3   | 4  | 0.61911 | 0.02041  | 0.40218 | C    | 1   | 2   |
| C4   | 4  | 0.46783 | 0.02686  | 0.16507 | C    | 1   | 2   |
| C5   | 4  | 0.49200 | 0.21745  | 0.46062 | C    | 1   | 2   |
| H5A  | 4  | 0.46320 | 0.16400  | 0.45530 | H    | 1   | 4   |
| C6   | 4  | 0.47350 | 0.25985  | 0.52307 | C    | 1   | 2   |
| H6A  | 4  | 0.43290 | 0.23560  | 0.55910 | H    | 1   | 4   |
| C7   | 4  | 0.51450 | 0.33656  | 0.53152 | C    | 1   | 2   |
| H7A  | 4  | 0.50140 | 0.36680  | 0.57310 | H    | 1   | 4   |
| C8   | 4  | 0.57610 | 0.37050  | 0.47873 | C    | 1   | 2   |
| C9   | 4  | 0.62600 | 0.44941  | 0.48467 | C    | 1   | 2   |
| H9A  | 4  | 0.61540 | 0.48160  | 0.52560 | H    | 1   | 4   |
| C10  | 4  | 0.68730 | 0.47858  | 0.43365 | C    | 1   | 2   |
| H10A | 4  | 0.71920 | 0.53100  | 0.43910 | H    | 1   | 4   |
| C11  | 4  | 0.70560 | 0.43257  | 0.37152 | C    | 1   | 2   |
| C12  | 4  | 0.77180 | 0.45955  | 0.31798 | C    | 1   | 2   |
| H12A | 4  | 0.80560 | 0.51150  | 0.32160 | H    | 1   | 4   |
| C13  | 4  | 0.78770 | 0.41156  | 0.26104 | C    | 1   | 2   |
| H13A | 4  | 0.83310 | 0.42920  | 0.22480 | H    | 1   | 4   |
| C14  | 4  | 0.73608 | 0.33578  | 0.25647 | C    | 1   | 2   |
| H14A | 4  | 0.74860 | 0.30240  | 0.21660 | H    | 1   | 4   |
| C15  | 4  | 0.65672 | 0.35501  | 0.36266 | C    | 1   | 2   |
| C16  | 4  | 0.59155 | 0.32392  | 0.41737 | C    | 1   | 2   |
| C17  | 4  | 0.37659 | 0.35153  | 0.31476 | C    | 1   | 2   |
| H17A | 4  | 0.35680 | 0.32010  | 0.35440 | H    | 1   | 4   |

|      |   |         |          |         |   |   |   |
|------|---|---------|----------|---------|---|---|---|
| C18  | 4 | 0.33990 | 0.43229  | 0.30994 | C | 1 | 2 |
| H18A | 4 | 0.29520 | 0.45430  | 0.34490 | H | 1 | 4 |
| C19  | 4 | 0.36960 | 0.47861  | 0.25420 | C | 1 | 2 |
| H19A | 4 | 0.34770 | 0.53400  | 0.25080 | H | 1 | 4 |
| C20  | 4 | 0.43230 | 0.44452  | 0.20205 | C | 1 | 2 |
| C21  | 4 | 0.46680 | 0.48919  | 0.14191 | C | 1 | 2 |
| H21A | 4 | 0.44860 | 0.54520  | 0.13730 | H | 1 | 4 |
| C22  | 4 | 0.52410 | 0.45367  | 0.09242 | C | 1 | 2 |
| H22A | 4 | 0.54690 | 0.48510  | 0.05370 | H | 1 | 4 |
| C23  | 4 | 0.55220 | 0.36865  | 0.09632 | C | 1 | 2 |
| C24  | 4 | 0.60660 | 0.32845  | 0.04379 | C | 1 | 2 |
| H24A | 4 | 0.62720 | 0.35710  | 0.00290 | H | 1 | 4 |
| C25  | 4 | 0.63020 | 0.24769  | 0.05122 | C | 1 | 2 |
| H25A | 4 | 0.66520 | 0.21900  | 0.01500 | H | 1 | 4 |
| C26  | 4 | 0.60190 | 0.20789  | 0.11337 | C | 1 | 2 |
| H26A | 4 | 0.62050 | 0.15210  | 0.11890 | H | 1 | 4 |
| C27  | 4 | 0.52280 | 0.32368  | 0.15595 | C | 1 | 2 |
| C28  | 4 | 0.46294 | 0.36177  | 0.20975 | C | 1 | 2 |
| C29  | 4 | 0.63590 | 0.04593  | 0.62260 | C | 1 | 2 |
| H29A | 4 | 0.61410 | -0.00900 | 0.61510 | H | 1 | 4 |
| C30  | 4 | 0.60710 | 0.08643  | 0.68276 | C | 1 | 2 |
| H30A | 4 | 0.56490 | 0.05970  | 0.71660 | H | 1 | 4 |
| C31  | 4 | 0.63970 | 0.16546  | 0.69362 | C | 1 | 2 |
| H31A | 4 | 0.62050 | 0.19340  | 0.73520 | H | 1 | 4 |
| C32  | 4 | 0.70140 | 0.20510  | 0.64337 | C | 1 | 2 |
| C33  | 4 | 0.73730 | 0.28746  | 0.64971 | C | 1 | 2 |
| H33A | 4 | 0.72140 | 0.31770  | 0.69080 | H | 1 | 4 |
| C34  | 4 | 0.79300 | 0.32298  | 0.59898 | C | 1 | 2 |
| H34A | 4 | 0.81460 | 0.37820  | 0.60450 | H | 1 | 4 |
| C35  | 4 | 0.82065 | 0.27956  | 0.53646 | C | 1 | 2 |
| C36  | 4 | 0.87770 | 0.31401  | 0.48118 | C | 1 | 2 |
| H36A | 4 | 0.90120 | 0.36910  | 0.48390 | H | 1 | 4 |
| C37  | 4 | 0.89900 | 0.26788  | 0.42397 | C | 1 | 2 |
| H37A | 4 | 0.93650 | 0.29060  | 0.38590 | H | 1 | 4 |
| C38  | 4 | 0.86490 | 0.18613  | 0.42146 | C | 1 | 2 |
| H38A | 4 | 0.88080 | 0.15480  | 0.38100 | H | 1 | 4 |
| C39  | 4 | 0.78929 | 0.19759  | 0.52839 | C | 1 | 2 |
| C40  | 4 | 0.72858 | 0.16164  | 0.58301 | C | 1 | 2 |

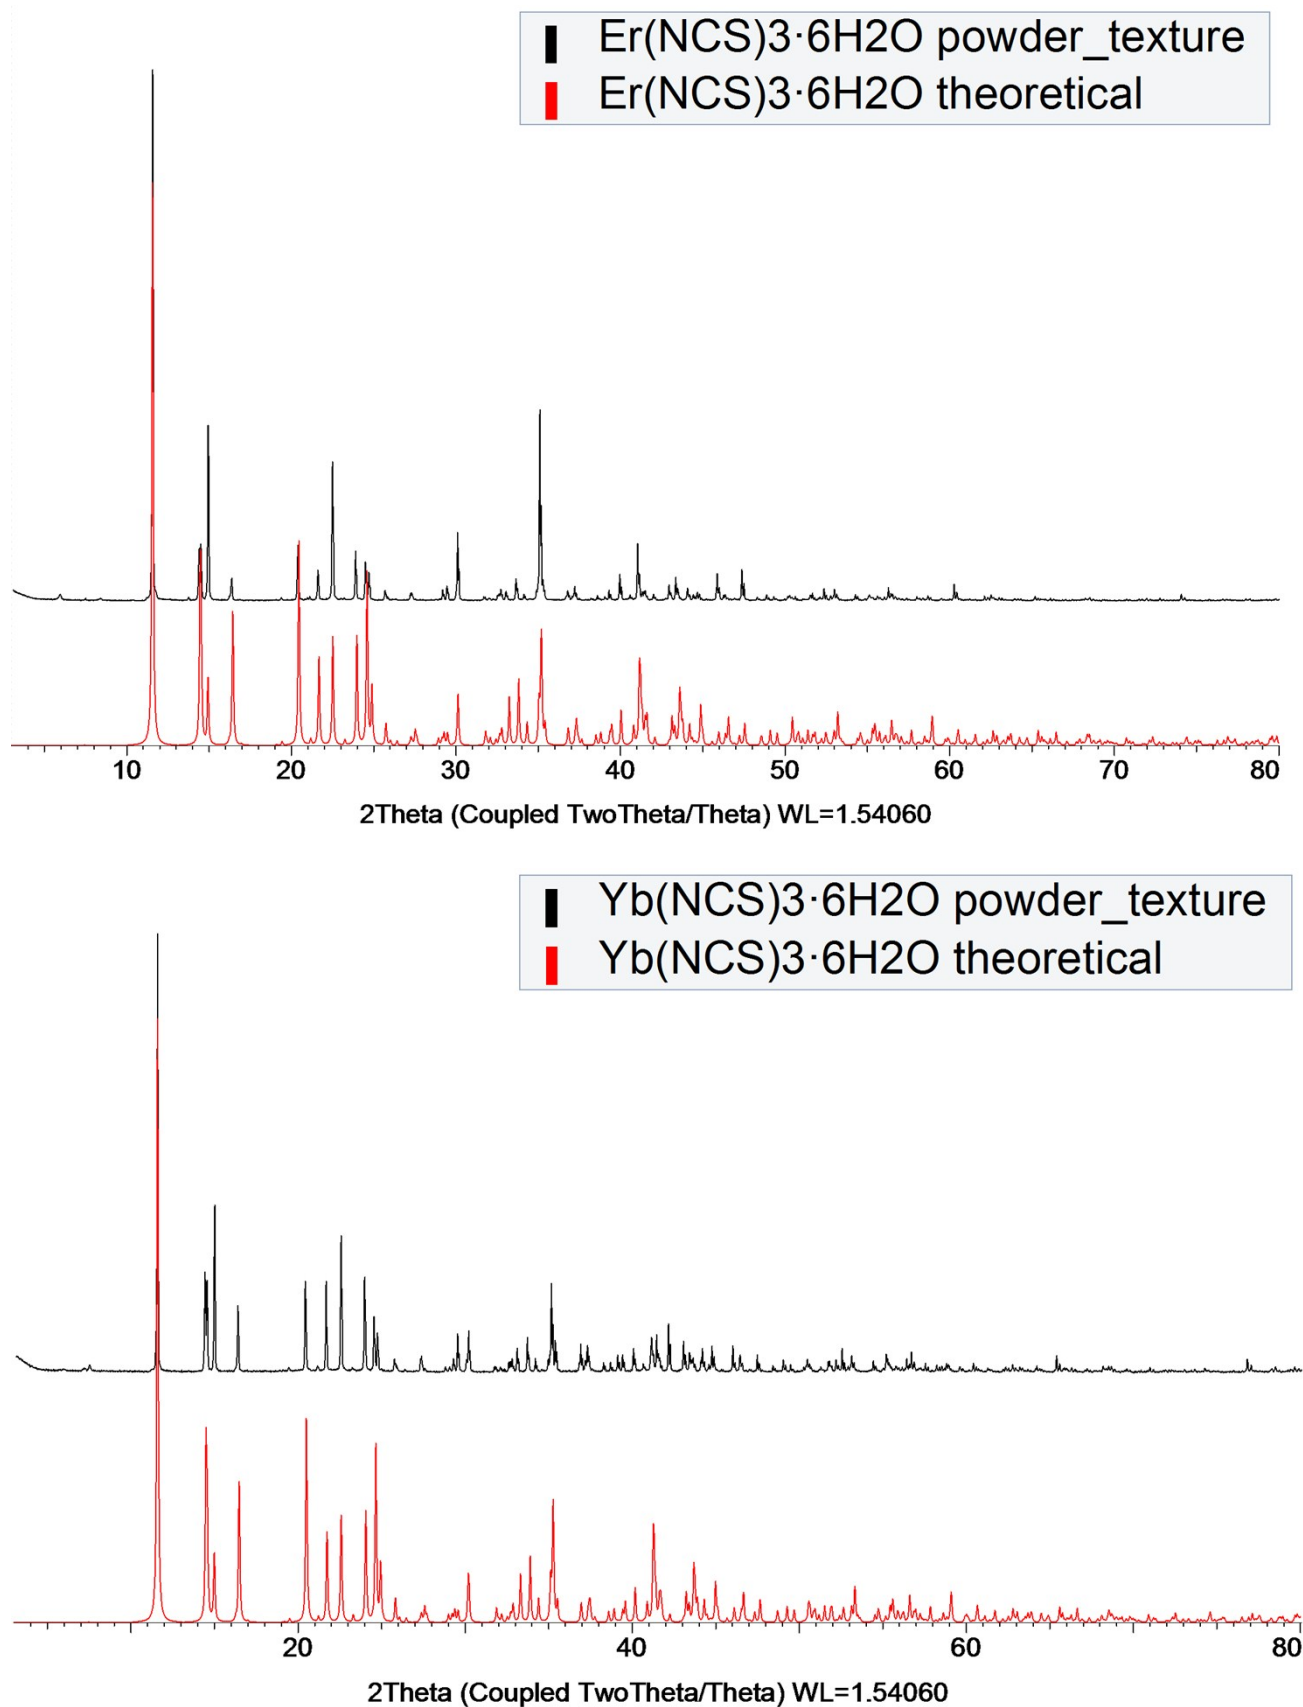

**Fig. S1.** Experimental and theoretical (considering the texturing) powder XRD patterns of **1Er** and **1Yb**.

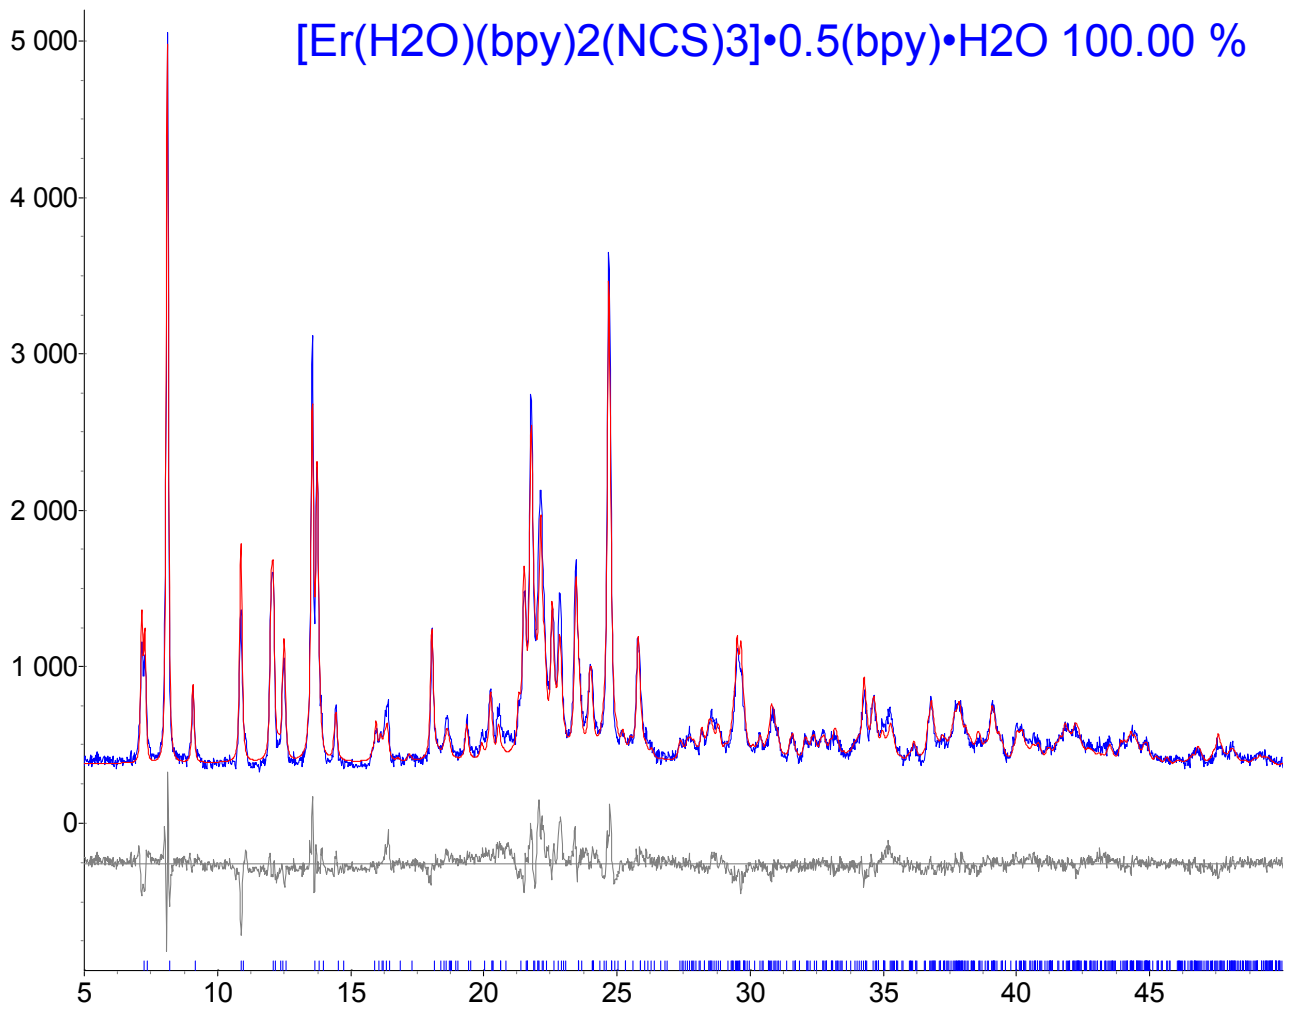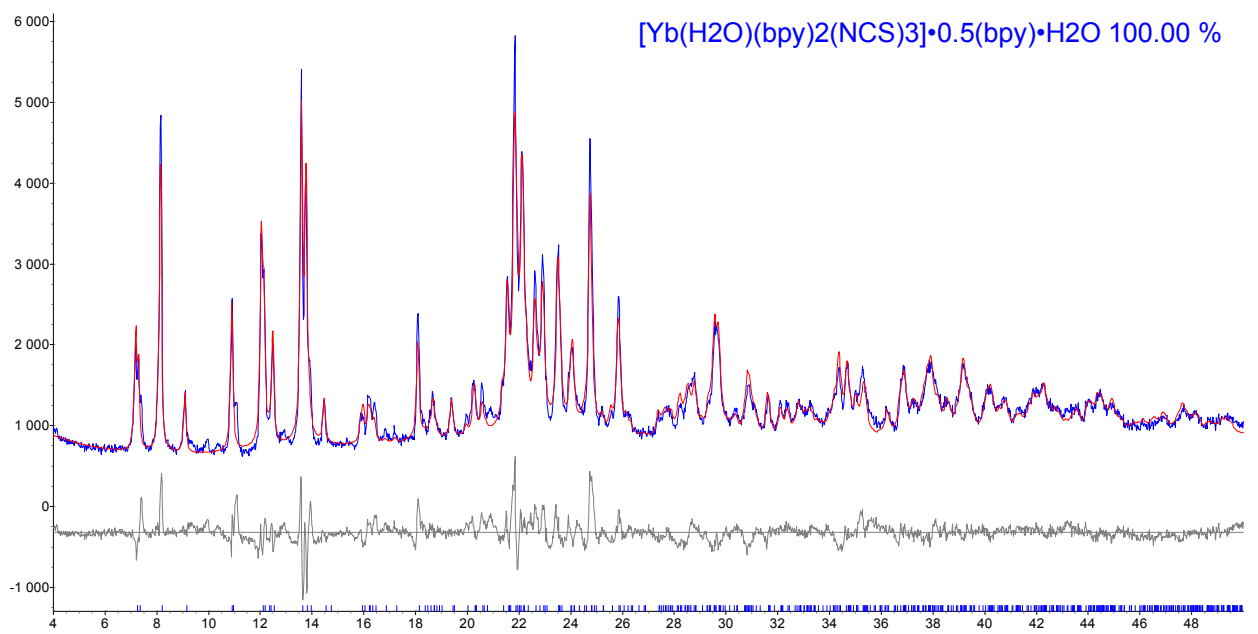

**a**

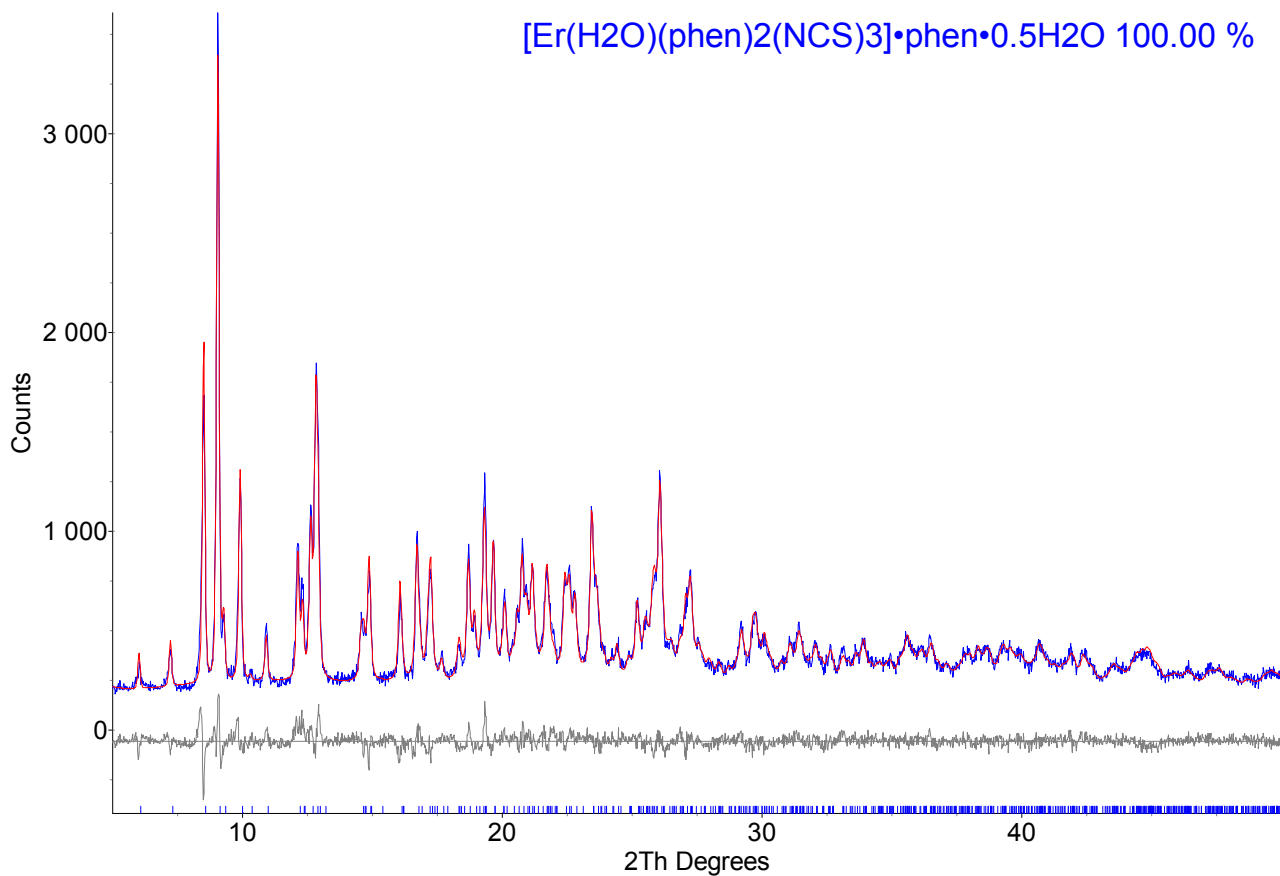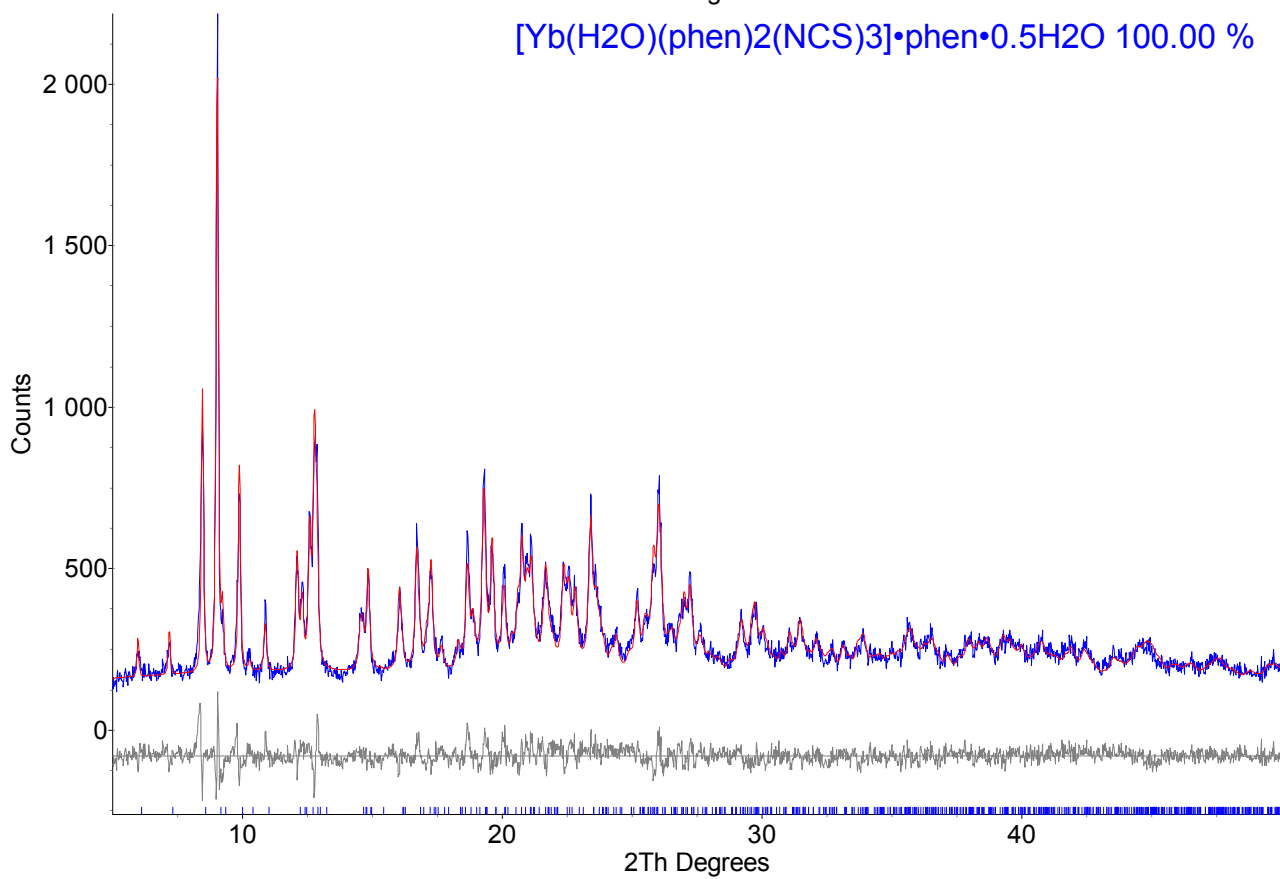

**b**

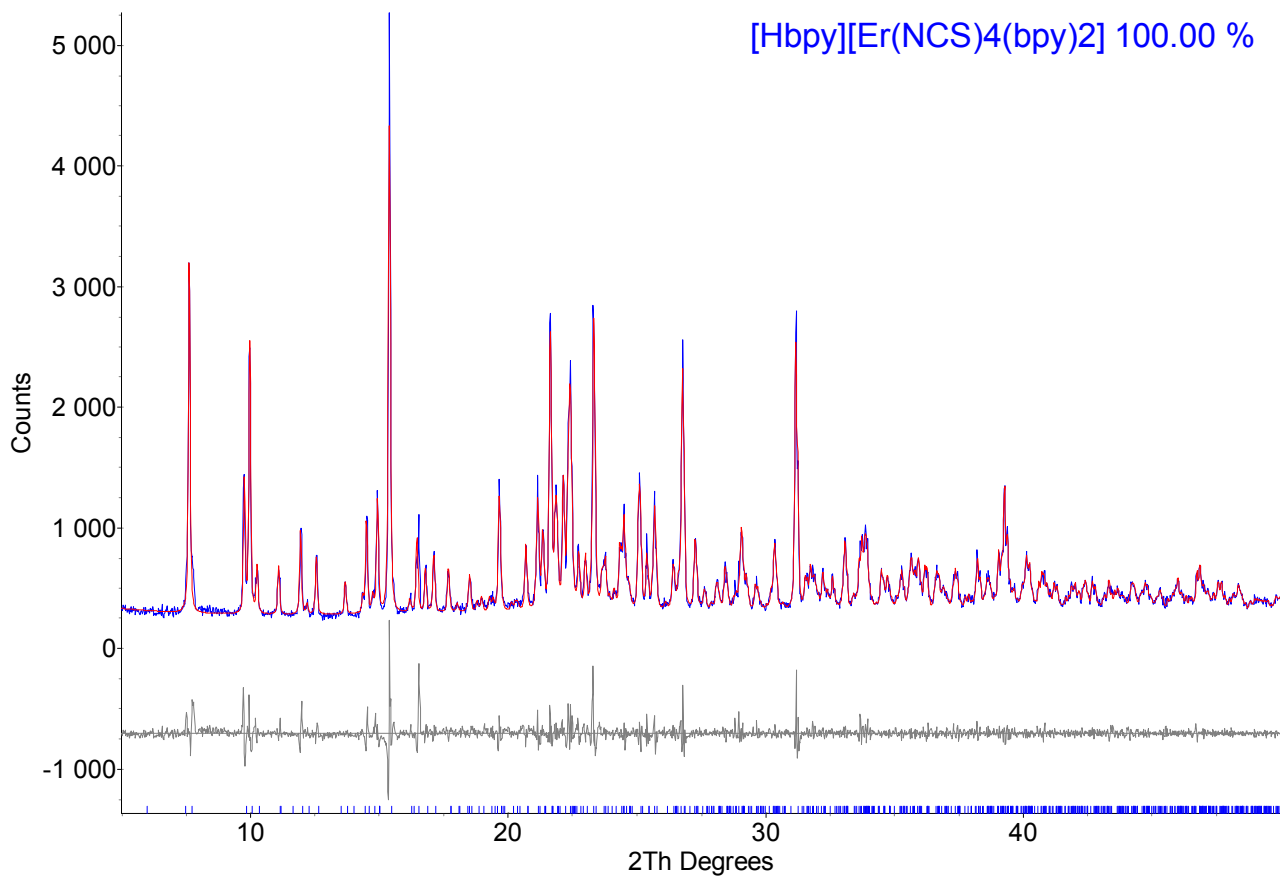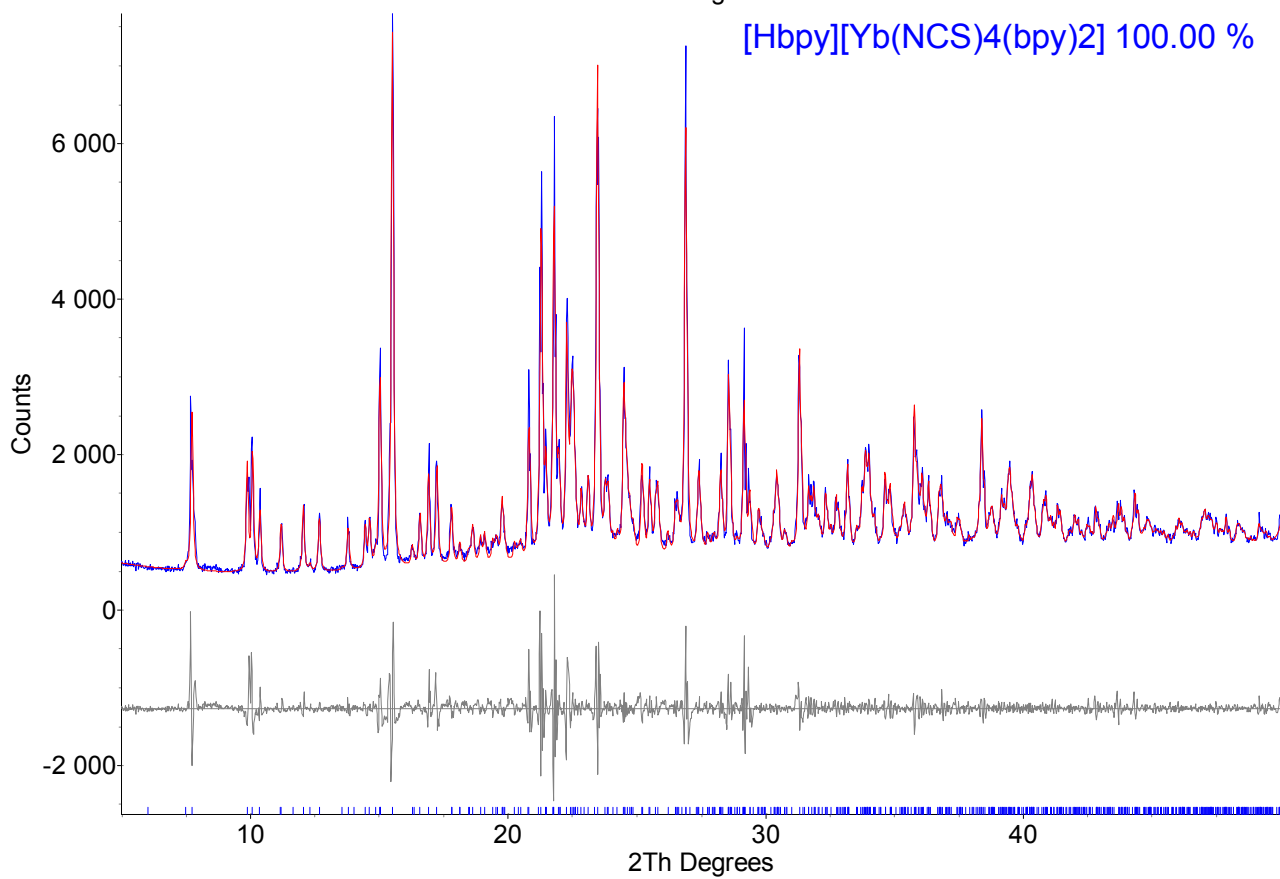

**c**



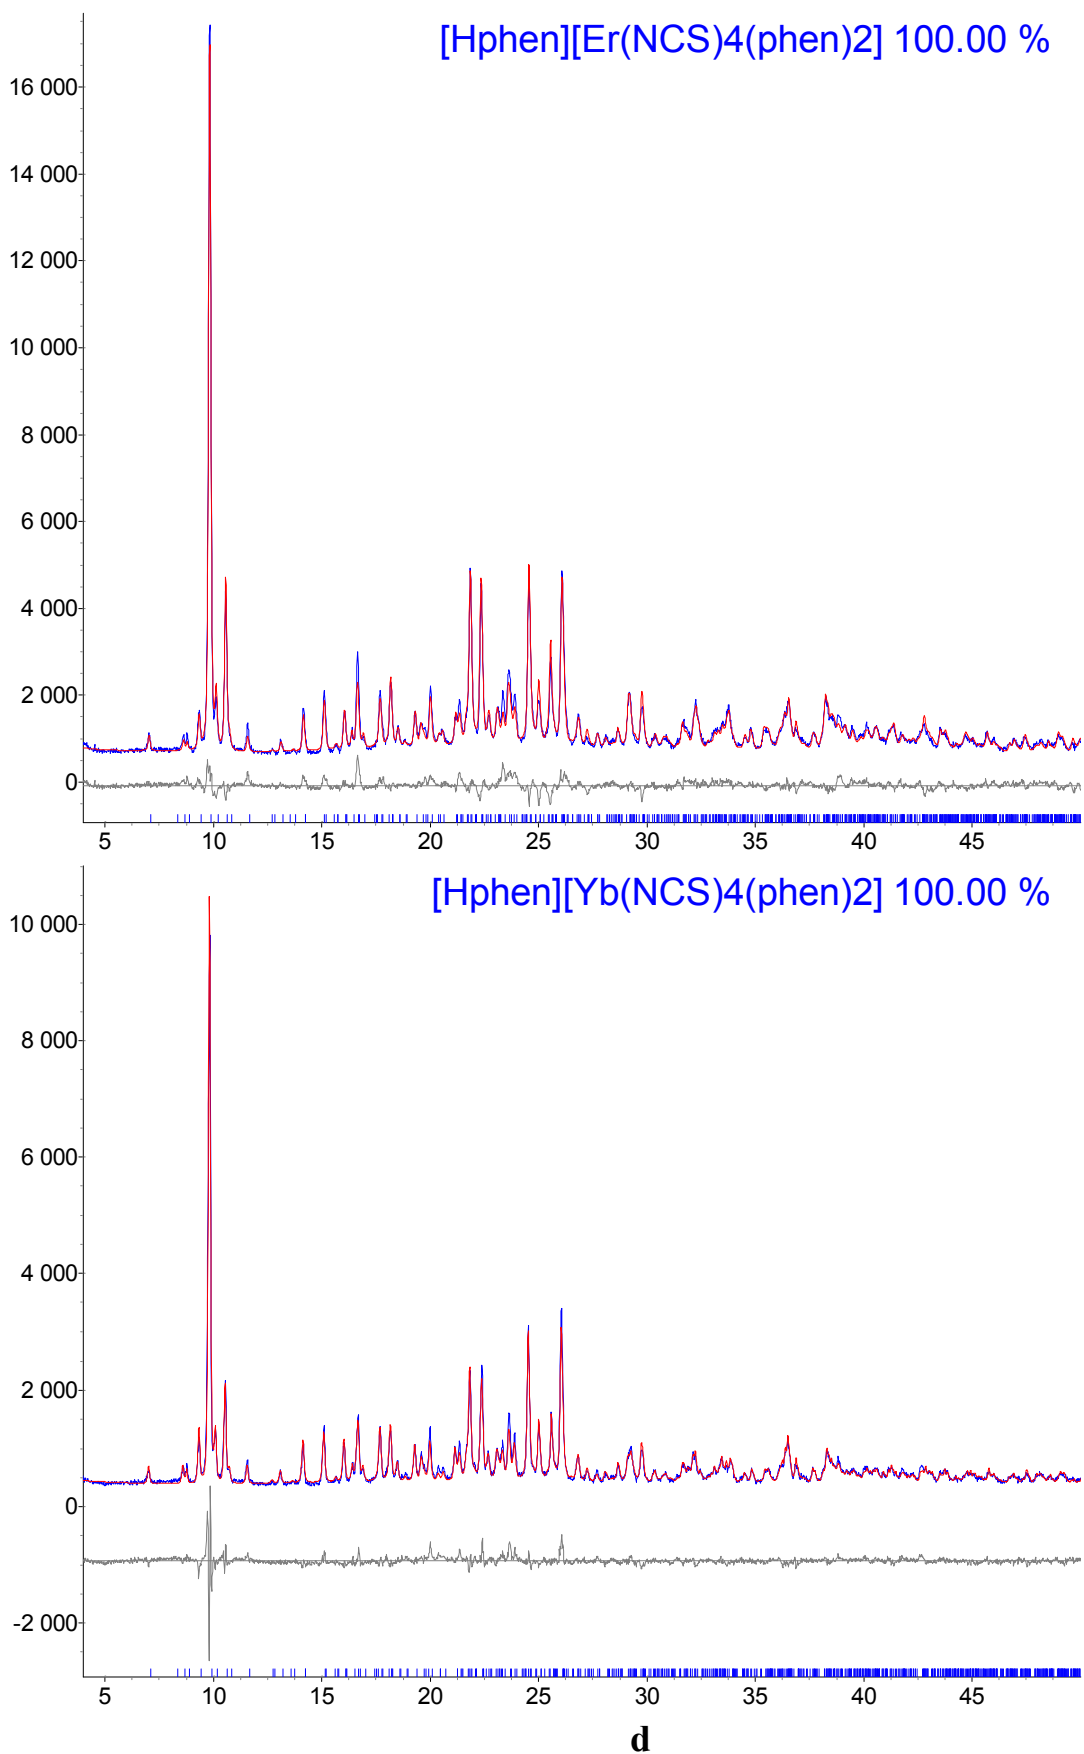

**Fig. S2.** Rietveld refinement profiles for **2Er, 2Yb (a)**; **3Er, 3Yb (b)**; **4Er, 4Yb (c)**; **5Er, 5Yb (d)** for room temperature powder X-ray data. The calculated and experimental profiles are shown with the red and blue line, respectively. The bottom trace shows the difference curve. The vertical bars indicate the calculated positions of the Bragg peaks.

### Thermal behavior of molecular complexes with bpy and phen

According to the results of thermoanalytical studies (Fig. S+3, S+4 Table S2), all the samples lose the outer-sphere H<sub>2</sub>O before 75°C. In the case of **2Er** and **2Yb**, the loss of coordinated H<sub>2</sub>O and subsequent elimination of outer-sphere bpy occur in the ranges of 75 – 120 °C and 140-190°C, respectively (Fig.S3, Table S2). For the complexes with 1,10-phenanthroline, coordinated H<sub>2</sub>O is being lost in 120-160 °C range (Fig.S4, Table S2).

Since all the afore mentioned processes take place at relatively low temperatures, they may also partially occur during the storage of the samples at ambient conditions thus contributing in the discrepancy between calculated and experimental content of the elements.

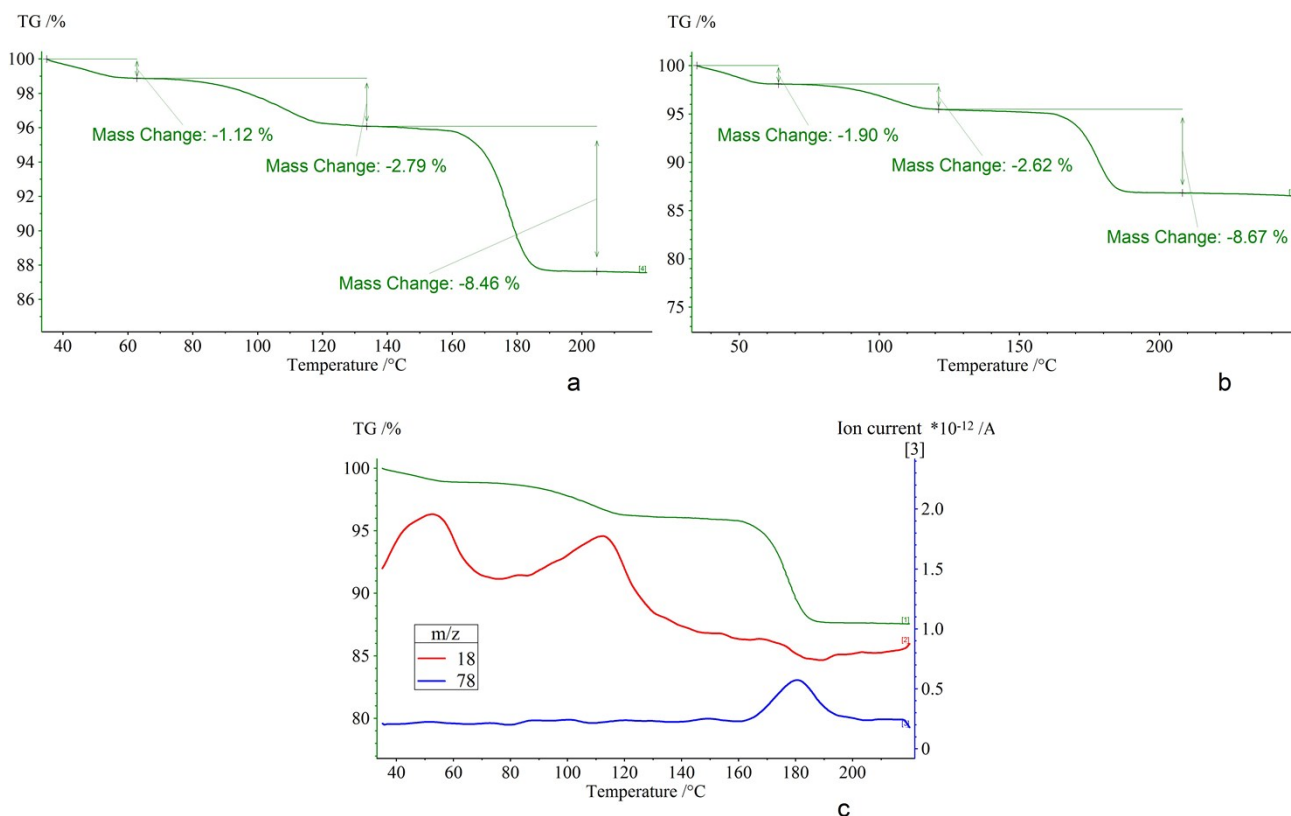

**Fig. S3.** TG curves of complexes **2Er** (a) and **2Yb** (b) and mass-spectra of gaseous products of decomposition of **2Er** (c) on heating under an Ar flow.

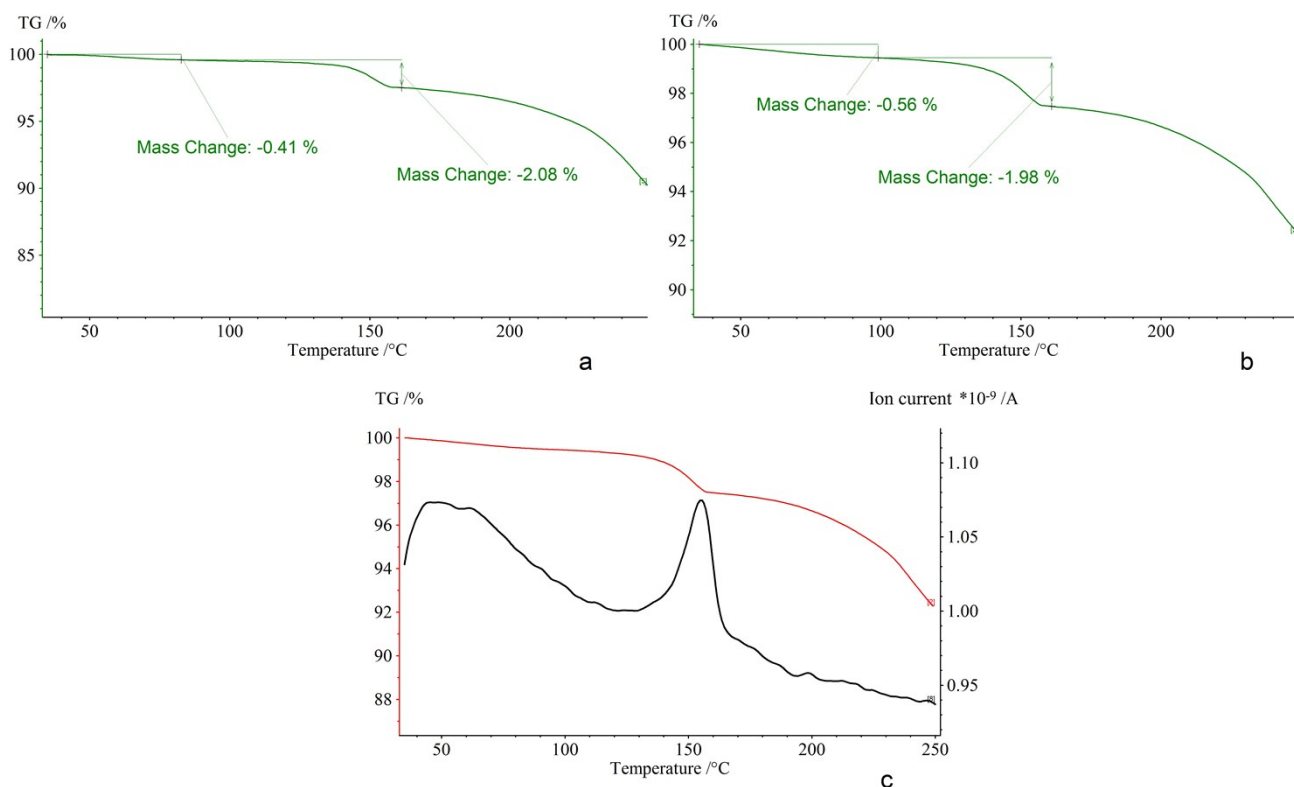

**Fig. S4.** TG curves of complexes **2Er** (a) and **2Yb** (b) and mass-spectra of gaseous products of decomposition of **2Er** (c) on heating under an Ar flow.

**Table S2.** Mass loss in a TGA experiment during the elimination of H<sub>2</sub>O and outer-sphere molecules.

| Complex    | Calculated overall H <sub>2</sub> O content, wt. % | Mass loss in a TGA experiment, wt. %* |                               |                  |
|------------|----------------------------------------------------|---------------------------------------|-------------------------------|------------------|
|            |                                                    | Coordinated H <sub>2</sub> O          | Outer-sphere H <sub>2</sub> O | Outer-sphere bpy |
| <b>2Er</b> | 4.69                                               | -1.12                                 | -2.77                         | -8.47            |
| <b>2Yb</b> | 4.65                                               | -0.63                                 | -2.78                         | -6.75            |
| <b>3Er</b> | 2.97                                               | -0.41                                 | -2.08                         | -                |
| <b>3Yb</b> | 2.95                                               | -0.56                                 | -1.98                         | -                |

\*Uncertainty of a measurement due to weighting does not exceed 0.2 wt.%; scatter due to uneven solvate molecules evaporation during the storage is higher and can be estimated from [Yb(H<sub>2</sub>O)(bpy)<sub>2</sub>(NCS)<sub>3</sub>]·0.5bpy·H<sub>2</sub>O samples.

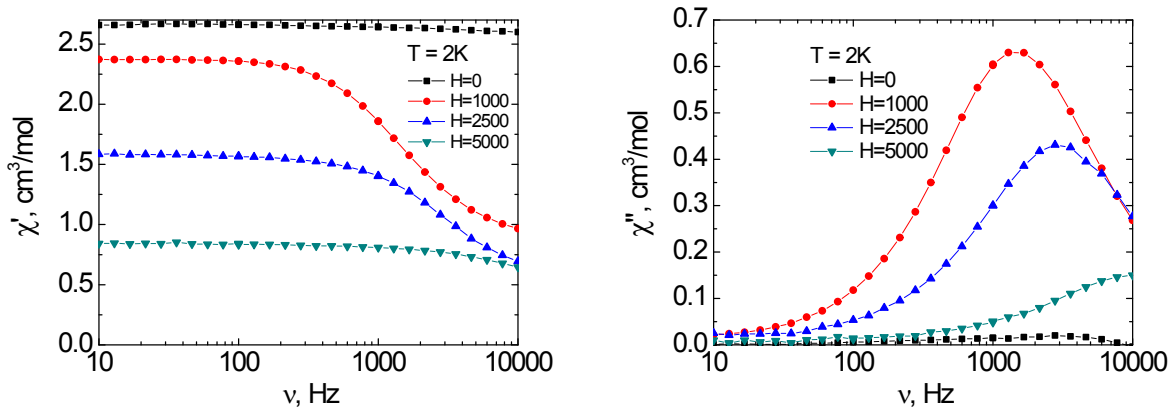

**Fig. S5.** Frequency dependences of the real ( $\chi'$ , left) and imaginary ( $\chi''$ , right) components of the ac susceptibility at 2 K for **1Er** in various dc-fields.

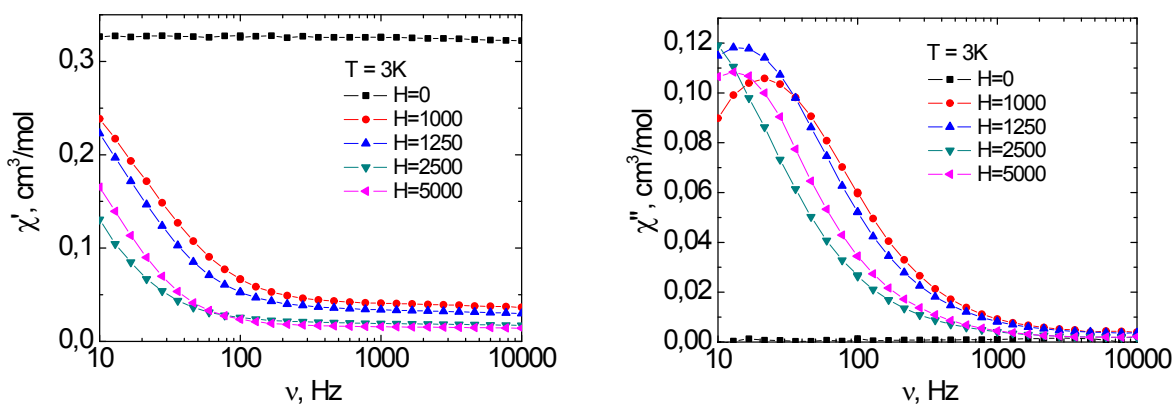

**Fig. S6.** Frequency dependences of the real ( $\chi'$ , left) and imaginary ( $\chi''$ , right) components of the ac susceptibility at 3 K for **1Yb** in various dc-fields.

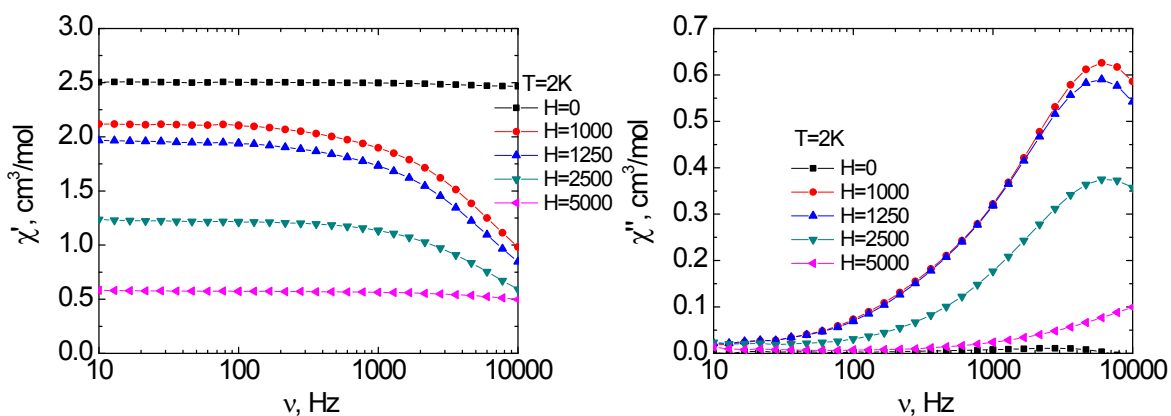

**Fig. S7.** Frequency dependences of the real ( $\chi'$ , left) and imaginary ( $\chi''$ , right) components of the ac susceptibility at 2 K for **2Er** in various dc-fields.

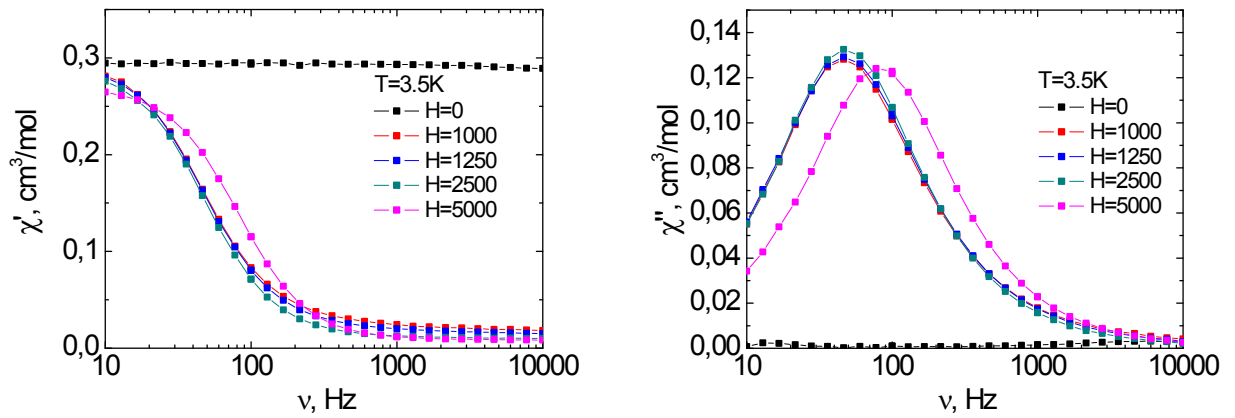

**Fig. S8.** Frequency dependences of the real ( $\chi'$ , left) and imaginary ( $\chi''$ , right) components of the ac susceptibility at 3.5 K for **2Yb** in various dc-fields.

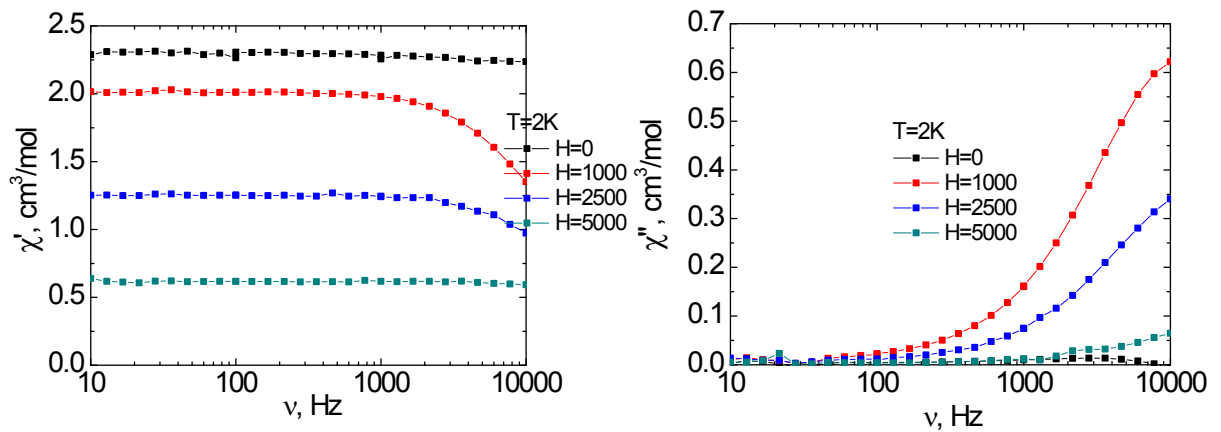

**Fig. S9.** Frequency dependences of the real ( $\chi'$ , left) and imaginary ( $\chi''$ , right) components of the ac susceptibility at 2 K for **3Er** in various dc-fields.

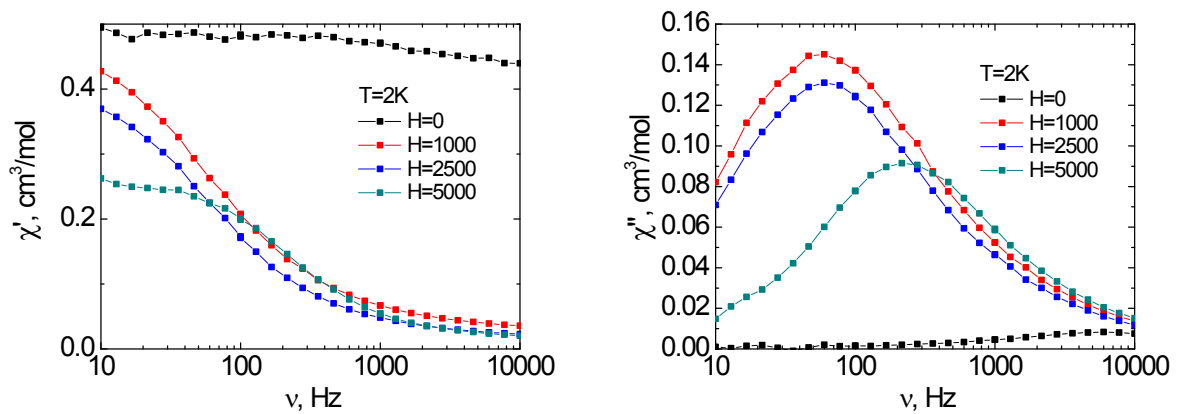

**Fig. S10.** Frequency dependences of the real ( $\chi'$ , left) and imaginary ( $\chi''$ , right) components of the ac susceptibility at 2 K for **3Yb** in various dc-fields.

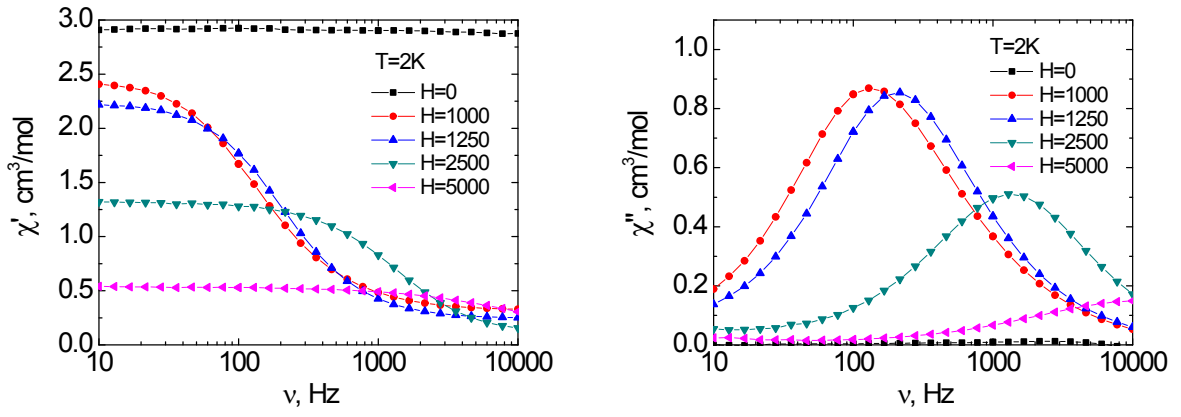

**Fig. S11.** Frequency dependences of the real ( $\chi'$ , left) and imaginary ( $\chi''$ , right) components of the ac susceptibility at 2 K for **4Er** in various dc-fields.

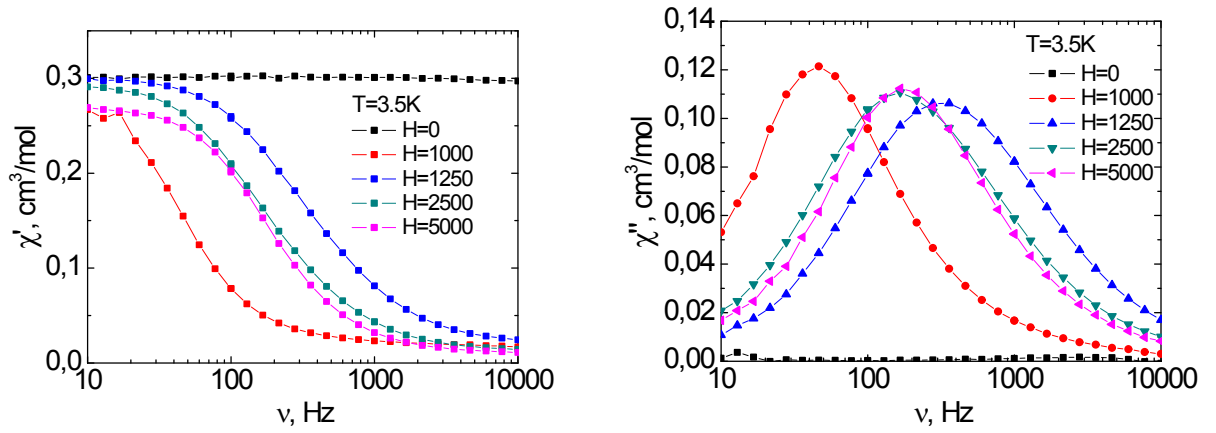

**Fig. S12.** Frequency dependences of the real ( $\chi'$ , left) and imaginary ( $\chi''$ , right) components of the ac susceptibility at 3.5 K for **4Yb** in various dc-fields.

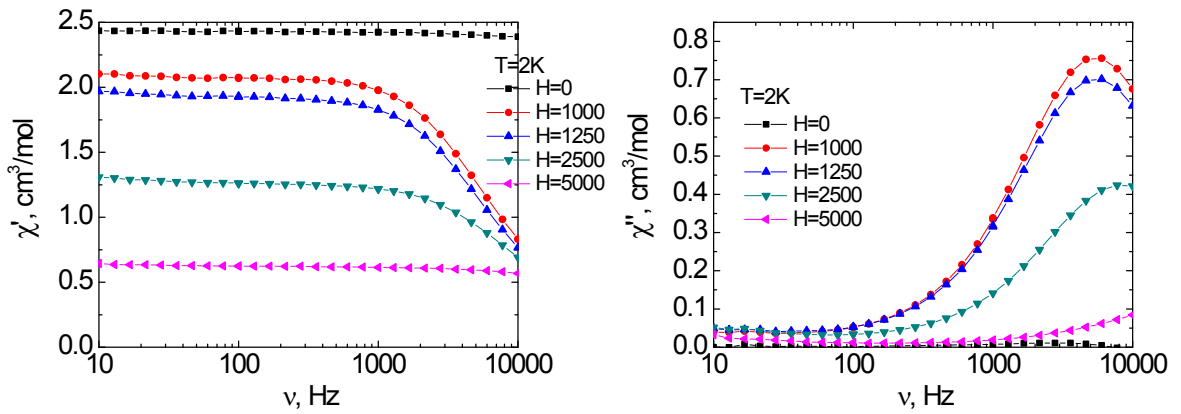

**Fig. S13.** Frequency dependences of the real ( $\chi'$ , left) and imaginary ( $\chi''$ , right) components of the ac susceptibility at 2 K for **5Er** in various dc-fields.

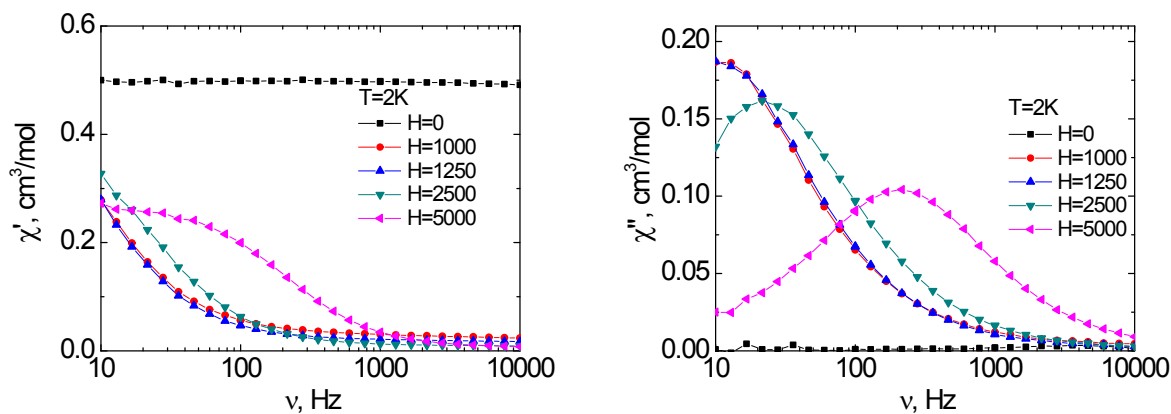

**Fig. S14.** Frequency dependences of the real ( $\chi'$ , left) and imaginary ( $\chi''$ , right) components of the ac susceptibility at 2 K for **5Yb** in various dc-fields.

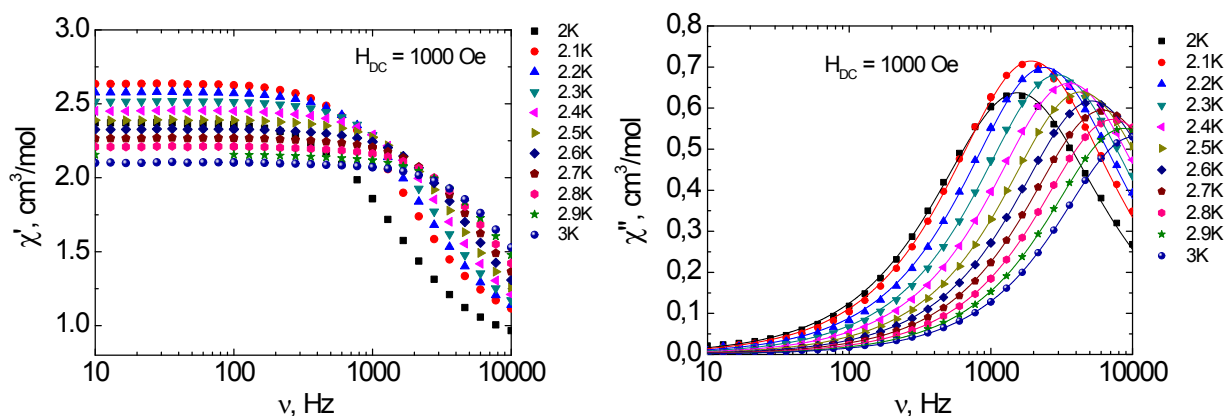

**Fig. S15.** Frequency dependence of the real ( $\chi'$ , left) and imaginary ( $\chi''$ , right) components of the ac susceptibility between 2 and 3 K for **1Er** in 1000 Oe *dc*-field. Solid lines were fitted using the generalized Debye model.

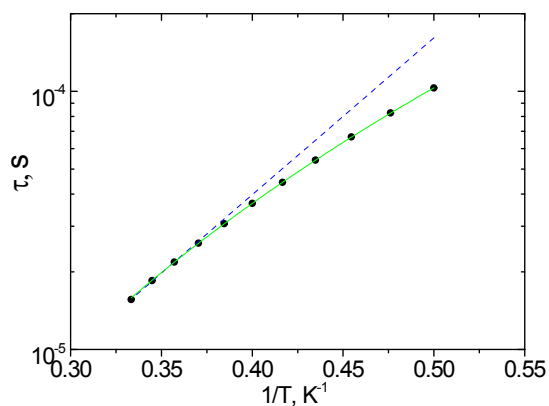

**Fig. S16.**  $\tau$  vs.  $T^{-1}$  plot for **1Er** in 1000 Oe *dc*-field. Blue dashed line represents the best fit by the Arrhenius equation (Orbach mechanism). Green solid line represents the best fit by the Raman mechanism.

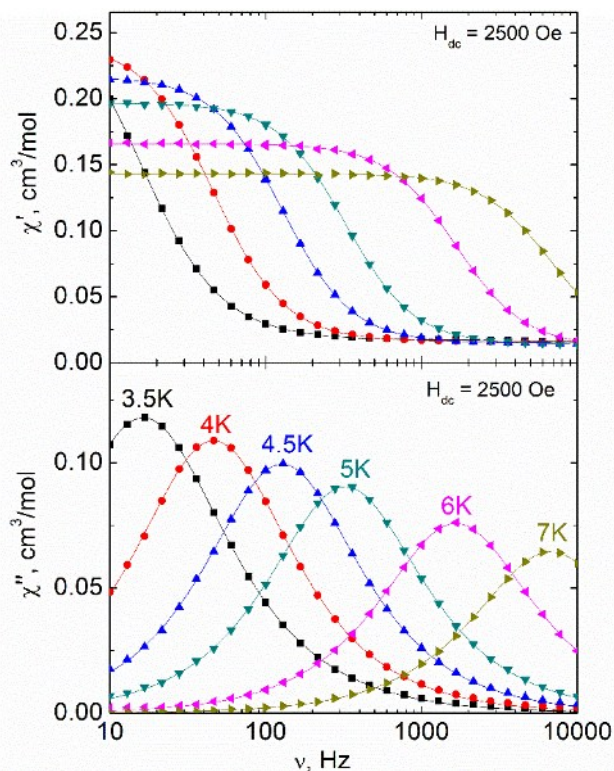

**Fig. S17.** Frequency dependencies of the real ( $\chi'$ , top) and imaginary ( $\chi''$ , bottom) components of the *ac* susceptibility between 3.5 and 7 K for **1Yb** in 2500 Oe *dc*-field. Solid lines were fitted using the generalized Debye model.

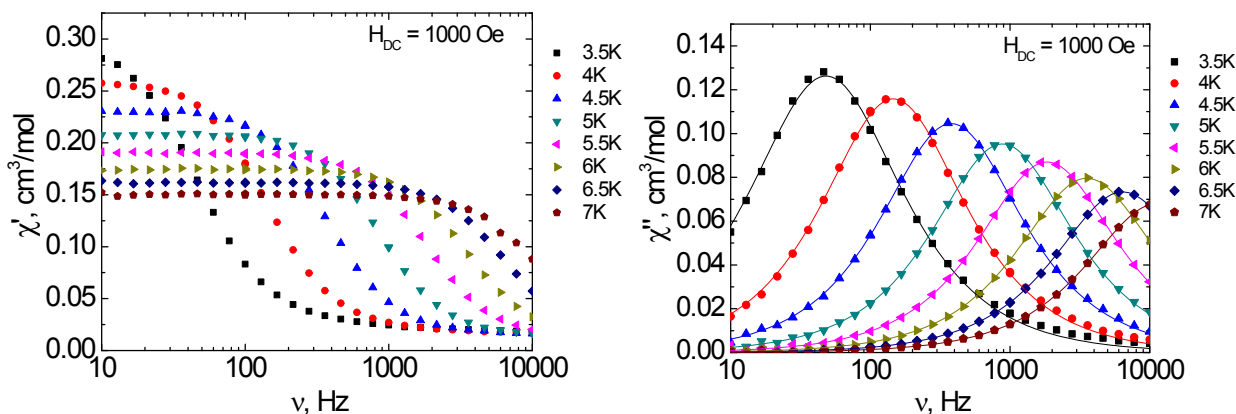

**Fig. S18.** Frequency dependence of the real ( $\chi'$ , left) and imaginary ( $\chi''$ , right) components of the *ac* susceptibility between 3.5 and 7 K for **2Yb** in 1000 Oe *dc*-field. Solid lines were fitted using the generalized Debye model.

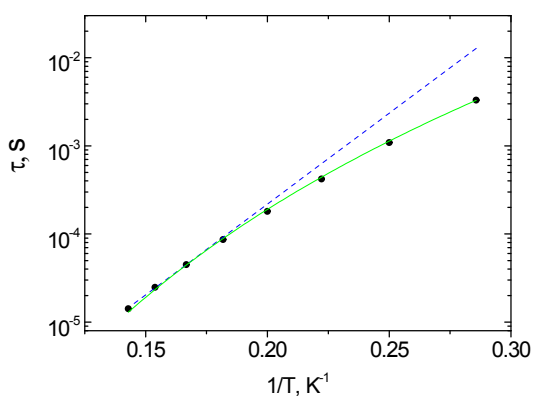

**Fig. S19.**  $\tau$  vs.  $T^{-1}$  plot for **2Yb** in 1000 Oe *dc*-field. Blue dashed line represents the best fit by the Arrhenius equation (Orbach mechanism). Green solid line represents the best fit by the Raman mechanism.



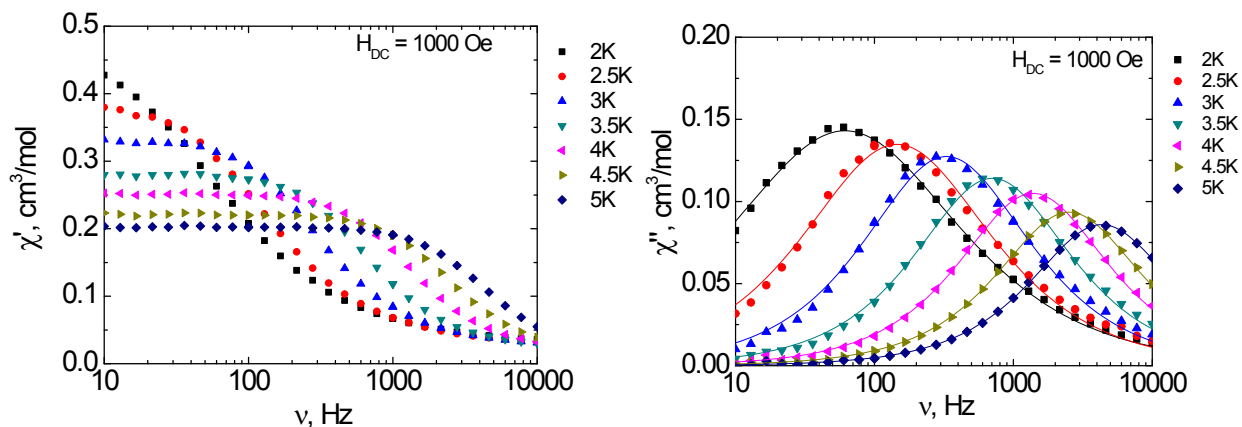

**Fig. S20.** Frequency dependence of the real ( $\chi'$ , left) and imaginary ( $\chi''$ , right) components of the ac susceptibility between 2 and 5 K for **3Yb** in 1000 Oe  $dc$ -field. Solid lines were fitted using the generalized Debye model.

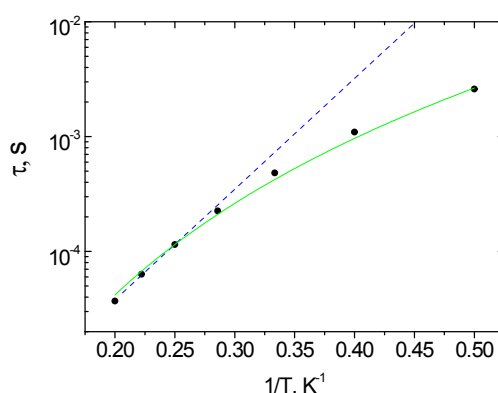

**Fig. S21.**  $\tau$  vs.  $T^{-1}$  plot for **3Yb** in 1000 Oe  $dc$ -field. Blue dashed line represents the best fit by the Arrhenius equation (Orbach mechanism). Green solid line represents the best fit by the Raman mechanism.

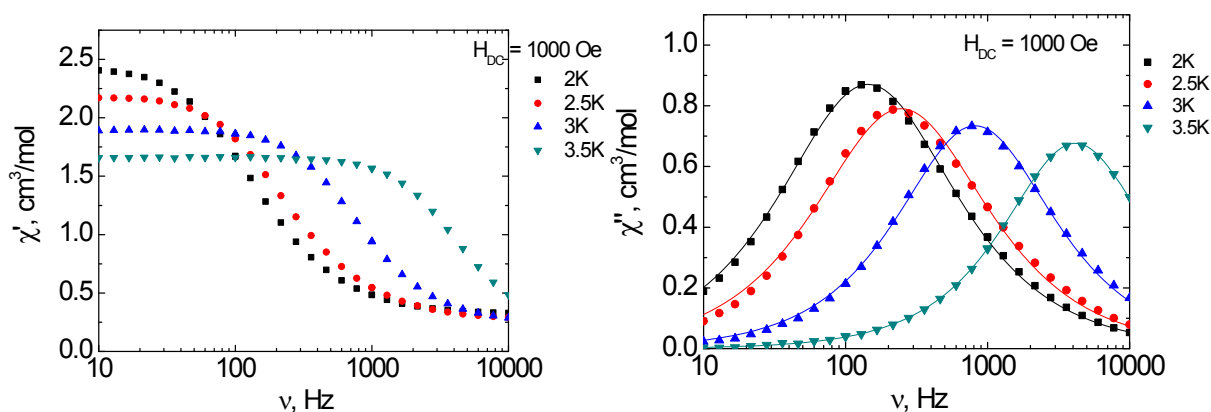

**Fig. S22.** Frequency dependence of the real ( $\chi'$ , left) and imaginary ( $\chi''$ , right) components of the ac susceptibility between 2 and 3.5 K for **4Er** in 1000 Oe  $dc$ -field. Solid lines were fitted using the generalized Debye model.

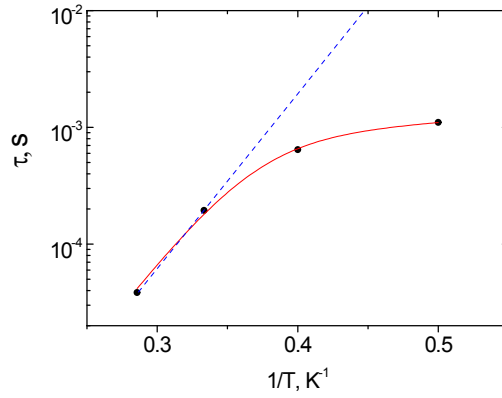

**Fig. S23.**  $\tau$  vs.  $T^{-1}$  plot for **4Er** in 1000 Oe  $dc$ -field. Blue dashed line represents the best fit by the Arrhenius equation (Orbach mechanism). Red solid line represents the best fit by the sum of Orbach and direct mechanisms.

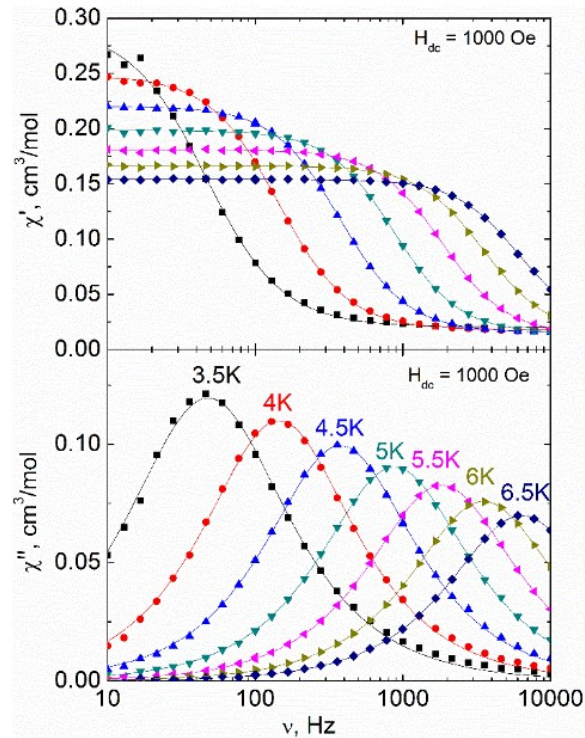

**Fig. S24.** Frequency dependencies of the real ( $\chi'$ , top) and imaginary ( $\chi''$ , bottom) components of the  $ac$  susceptibility between 3.5 and 6.5 K for **4Yb** in 1000 Oe  $dc$ -field. Solid lines were fitted using the generalized Debye model.

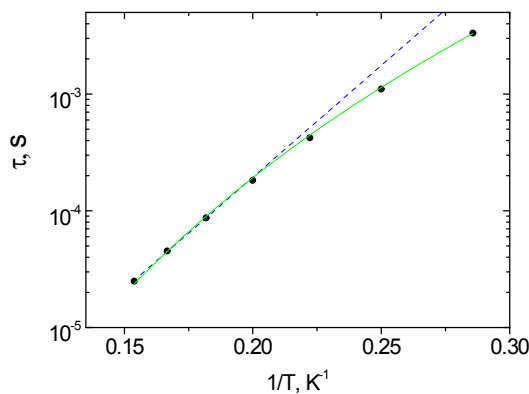

**Fig. S25.**  $\tau$  vs.  $T^{-1}$  plot for **4Yb** in 1000 Oe  $dc$ -field. Blue dashed line represents the best fit by the Arrhenius equation (Orbach mechanism). Green solid line represents the best fit by the Raman mechanism.

**Table S3.** Results of the relaxation data approximation for the complexes with account for errors.

| Complex        |                                                | 1Er                                                 | 1Yb                                                | 2Yb                                               | 3Yb                                             | 4Yb                                               | 5Yb                                             |                       |                                                | 4Er                                                 |
|----------------|------------------------------------------------|-----------------------------------------------------|----------------------------------------------------|---------------------------------------------------|-------------------------------------------------|---------------------------------------------------|-------------------------------------------------|-----------------------|------------------------------------------------|-----------------------------------------------------|
| Figure         |                                                | Fig. S14                                            | Fig. 4                                             | Fig. S17                                          | Fig. S19                                        | Fig. 4                                            | Fig. 4                                          |                       |                                                | Fig. S21                                            |
| Raman          | C, $K^{-n}_{\text{Raman}} \cdot \text{s}^{-1}$ | $2.54 \times 10^{-3}$<br>( $\pm 2 \times 10^{-5}$ ) | 440 ( $\pm 6$ )                                    | 72.6 ( $\pm 0.4$ )                                | 0.061<br>( $\pm 0.001$ )                        | 72.8 ( $\pm 0.4$ )                                | 0.59 ( $\pm 0.02$ )                             | Raman                 | C, $K^{-n}_{\text{Raman}} \cdot \text{s}^{-1}$ | -                                                   |
|                | $n_{\text{Raman}}$                             | <b>4.622 (<math>\pm 0.008</math>)</b>               | <b>8.55 (<math>\pm 0.01</math>)</b>                | <b>7.985 (<math>\pm 0.004</math>)</b>             | <b>4.53 (<math>\pm 0.03</math>)</b>             | <b>7.982 (<math>\pm 0.005</math>)</b>             | <b>5.16 (<math>\pm 0.05</math>)</b>             |                       | $n_{\text{Raman}}$                             | -                                                   |
|                | $R_{\text{Ram}}$                               | 0.99875                                             | 0.9984                                             | 0.9997                                            | 0.99541                                         | 0.99972                                           | 0.98606                                         |                       | $R_{\text{Ram}}$                               | -                                                   |
| Orbach         | Temperature range, K                           | 2.8-3                                               | 5-7                                                | 6-7                                               | 4-5                                             | 5.5–6.5                                           | 6-7                                             | Orbach                | Temperature range, K                           | 2.5-3.5                                             |
|                | $\Delta_{\text{eff}}/k_B$ , K                  | <b>14 (<math>\pm 1</math>)</b>                      | <b>50 (<math>\pm 1</math>)</b>                     | <b>47 (<math>\pm 1</math>)</b>                    | <b>22 (<math>\pm 1</math>)</b>                  | <b>44 (<math>\pm 1</math>)</b>                    | <b>37 (<math>\pm 1</math>)</b>                  |                       | $\Delta_{\text{eff}}/k_B$ , K                  | <b>35 (<math>\pm 1</math>)</b>                      |
|                | $\tau_0$ , s                                   | $1.5 \times 10^{-7}$ ( $\pm 1.8 \times 10^{-8}$ )   | $2.3 \times 10^{-8}$ ( $\pm 7.5 \times 10^{-9}$ )  | $1.7 \times 10^{-8}$                              | $4.5 \times 10^{-7}$                            | $2.9 \times 10^{-8}$                              | $8.4 \times 10^{-8}$                            |                       | $\tau_0$ , s                                   | $2.0 \times 10^{-9}$                                |
|                | $R_{\text{Or}}$                                | 0.99998                                             | 0.99951                                            | 0.99893                                           | 0.99866                                         | 0.99951                                           | 0.99972                                         |                       | $R_{\text{Or}}$                                | 1                                                   |
| Orbach + Raman | $\Delta_{\text{eff}}/k_B$ , K                  | <b>20 (<math>\pm 1</math>)</b>                      | <b>56 (<math>\pm 1</math>)</b>                     | <b>38 (<math>\pm 1</math>)</b>                    | <b>26 (<math>\pm 1</math>)</b>                  | <b>40 (<math>\pm 1</math>)</b>                    | <b>37 (<math>\pm 1</math>)</b>                  | <b>Orbach+ direct</b> | $\Delta_{\text{eff}}/k_B$ , K                  | <b>35 (<math>\pm 1</math>)</b>                      |
|                | $\tau_0$ , s                                   | $2.0 \times 10^{-7}$ ( $\pm 8.6 \times 10^{-8}$ )   | $1.3 \times 10^{-8}$ ( $\pm 3.7 \times 10^{-10}$ ) | $4.5 \times 10^{-7}$ ( $\pm 1.8 \times 10^{-7}$ ) | $3.3 \times 10^{-7}$ ( $\pm 3 \times 10^{-8}$ ) | $2.3 \times 10^{-7}$ ( $\pm 3.9 \times 10^{-8}$ ) | $1.0 \times 10^{-7}$ ( $\pm 1 \times 10^{-8}$ ) |                       | $\tau_0$ , s                                   | $1.9 \times 10^{-9}$ ( $\pm 1.3 \times 10^{-10}$ )  |
|                | C, $K^{-n}_{\text{Raman}} \cdot \text{s}^{-1}$ | 433 ( $\pm 42$ )                                    | $2.74 \times 10^{-2}$ ( $\pm 3 \times 10^{-4}$ )   | 0.012 ( $\pm 0.001$ )                             | 34.3 ( $\pm 0.7$ )                              | 0.015 ( $\pm 8.5 \times 10^{-4}$ )                | 3.8 ( $\pm 0.2$ )                               |                       | A_direct                                       | $4.5 \times 10^{-10}$ ( $\pm 5.6 \times 10^{-12}$ ) |
|                | n                                              | 4.5 ( $\pm 0.2$ )                                   | 6.5 ( $\pm 0.1$ )                                  | 7.9 ( $\pm 0.1$ )                                 | 3.47 ( $\pm 0.03$ )                             | 7.8 ( $\pm 0.1$ )                                 | 3.99 ( $\pm 0.05$ )                             |                       | n_direct                                       | 4*                                                  |
|                | $R_{\text{Or}_\text{Ram}}$                     | 0.99999                                             | 1                                                  | 1                                                 | 1                                               | 1                                                 | 0.99977                                         |                       | $R_{\text{Or}_\text{dir}}$                     | 0.99921                                             |

\*  $n_{\text{direct}} = 4$  is set as a constant for Kramers systems.
